# Supplementary material for: Medicinal Plant Preparations Administered by Botswana Traditional Health Practitioners for Treatment of Worm Infections Show Anthelmintic Activities
Source: MDPI journal article supplement (doi:10.3390/plants11212945), 2022-11-01
Supplement: s1 [file s1]

# Medicinal Plant Preparations Administered by Botswana Traditional Health Practitioners for Treatment of Worm Infections Show Anthelmintic Activities

Mthandazo Dube <sup>1</sup>, Boingotlo Raphane <sup>2</sup>, Bongani Sethebe <sup>2</sup>, Nkaelang Seputhe<sup>6</sup>, Tsholofelo Tiroyakgosi<sup>6</sup>, Peter Imming <sup>3</sup>, Cécile Häberli <sup>4,5</sup>, Jennifer Keiser <sup>4,5</sup>, Norbert Arnold <sup>1</sup>, Kerstin Andrae-Marobela <sup>2,\*</sup>

<sup>1</sup> Department of Bioorganic Chemistry, Leibniz Institute of Plant Biochemistry, Weinberg 3, D-06120 Halle (Saale), Germany

<sup>2</sup> Department of Biological Sciences, Faculty of Science, University of Botswana, P.O. Box 0022, Gaborone, Botswana

<sup>3</sup> Institute of Pharmacy, Faculty of Natural Sciences, Martin-Luther-University Halle-Wittenberg, D-06120 Halle (Saale), Germany

<sup>4</sup> Swiss Tropical and Public Health Institute, Socinstr. 57, CH-4051 Basel, Switzerland

<sup>5</sup> University of Basel, CH-4051 Basel, Switzerland

<sup>6</sup> Kwame Legwame Traditional Association, Maun, Botswana

\* Correspondence: [marobelak@ub.ac.bw](mailto:marobelak@ub.ac.bw); Tel.: +267 355 2609 (K.A.-M.)

**Table S1: Anthelmintic activity against parasitic helminths.**

|                                          | <i>A. ferox</i><br>leaves | <i>A. zebrina</i><br>leaves | <i>B. albitrunca</i><br>leaves | <i>C. mopane</i><br>seeds | <i>M. oleifera</i><br>leaves | <i>S. panduriforme</i><br>fruit | <i>T. sericea</i><br>roots |
|------------------------------------------|---------------------------|-----------------------------|--------------------------------|---------------------------|------------------------------|---------------------------------|----------------------------|
| Organism                                 | Mortality rate %*         |                             |                                |                           |                              |                                 |                            |
| NTS**<br>(100 µg/mL)                     | 46.15 ± 3.8               | 34.62 ± 3.8                 | 86.54 ± 5.8                    | 100 ± 0                   | 90.38 ± 5.8                  | 69.23 ± 3.8                     | 86.54 ± 9.6                |
| NTS**<br>(50 µg/mL)                      | 30.77 ± 0                 | 30.77 ± 0                   | 42.31 ± 3.8                    | 55.77 ± 1.9               | 30.77 ± 0                    | 61.54 ± 0                       | 34.62 ± 3.8                |
| <i>A. ceylanicum</i> L3<br>(100 µg/mL)   | 36.8 ± 7.1                | 29.2 ± 0.2                  | 33.6 ± 2.3                     | 54.5 ± 1.9                | 37.6 ± 1.9                   | 19.4 ± 4.2                      | 38.3 ± 7.8                 |
| <i>H. polygyrus</i> adult<br>(100 µg/mL) | 48.35 ± 8.3               | 31.65 ± 1.7                 | 50 ± 6.7                       | 53.35 ± 3.3               | 56.65 ± 3.3                  | 56.65 ± 3.3                     | 55 ± 1.7                   |
| <i>H. polygyrus</i> L3<br>(100 µg/mL)    | 7.9 ± 2.6                 | 7.1 ± 3.3                   | 23.2 ± 2                       | 11.1 ± 4.4                | 14.3 ± 1.6                   | 10.3 ± 0.1                      | 14.4 ± 0.5                 |
| <i>N. americanus</i> L3<br>(100 µg/mL)   | 11.8 ± 4.8                | 3.5 ± 2.7                   | 0.3 ± 1.5                      | 4.3 ± 3.6                 | 6.5 ± 5                      | 15.3 ± 5.1                      | 15.4 ± 2.7                 |
| <i>S. ratti</i> L3<br>(100 µg/mL)        | 51.8 ± 4.6                | 28.4 ± 4.7                  | 36.4 ± 3.4                     | 21.9 ± 6.8                | 58.2 ± 9.8                   | 34.4 ± 2.1                      | 36.8 ± 2.3                 |
| <i>T. muris</i> adult<br>(100 µg/mL)     | 33.35 ± 3.3               | 38.35 ± 1.7                 | 38.35 ± 1.7                    | 55.5 ± 5                  | 40 ± 0                       | 66.65 ± 3.3                     | 40 ± 0                     |
| <i>T. muris</i> adult<br>(50 µg/mL)      | nt                        | nt                          | nt                             | nt                        | nt                           | 29.6 ± 0                        | nt                         |

\*mortality % based on three replicates; \*\* NTS = newly transformed schistosomula; nt = not tested

**Table S2: Most active plants against *S. mansoni* and NTS.**

|                                          | <i>L. luteoalbum</i><br>roots | <i>L. luteoalbum</i><br>leaves | <i>C. pyracanthoides</i><br>stem bark | <i>C. imberbe</i><br>leaves |
|------------------------------------------|-------------------------------|--------------------------------|---------------------------------------|-----------------------------|
| Organism                                 | Mortality rate %*             |                                |                                       |                             |
| NTS**<br>(100 µg/mL)                     | 96.15 ± 3.8                   | 96.15 ± 3.8                    | 80.77 ± 3.8                           | 100 ± 0                     |
| NTS**<br>(50 µg/mL)                      | 90.38 ± 1.9                   | 94.32 ± 1.9                    | 76.92 ± 0                             | 98.08 ± 1.9                 |
| NTS**<br>(10 µg/mL)                      | 87.5 ± 0                      | 91.67 ± 0                      | 52.08 ± 2.1                           | 29.17 ± 4.2                 |
| NTS**<br>(1 µg/mL)                       | 85.42 ± 2.1                   | 85.42 ± 2.1                    | nt                                    | nt                          |
| NTS**<br>(0.1 µg/mL)                     | 35.71 ± 0                     | 28.57 ± 3.6                    | nt                                    | nt                          |
| <i>S. mansoni</i> adults<br>(50 µg/mL)   | 46.95 ± 2                     | 67.65 ± 3.9                    | 100 ± 0                               | 78.4 ± 5.9                  |
| <i>S. mansoni</i> adults<br>(10 µg/mL)   | 32.05 ± 3.6                   | 37.4 ± 1.8                     | 78.5 ± 0                              | 32.05 ± 3.6                 |
| <i>S. mansoni</i> adults<br>(1 µg/mL)    | nt                            | nt                             | 41.65 ± 1.7                           | nt                          |
| <i>A. ceylanicum</i> L3<br>(100 µg/mL)   | 45 ± 7.5                      | 53.1 ± 5.2                     | 63.3 ± 6.9                            | 45.6 ± 0.8                  |
| <i>H. polygyrus</i> adult<br>(100 µg/mL) | 51.65 ± 1.7                   | 46.7 ± 0                       | 43.35 ± 3.3                           | 40 ± 0                      |
| <i>H. polygyrus</i> L3<br>(100 µg/mL)    | 14.8 ± 0.7                    | 11.3 ± 0.6                     | 18.5 ± 3.9                            | 7.5 ± 3.4                   |
| <i>N. americanus</i> L3<br>(100 µg/mL)   | 6.9 ± 4                       | 16.5 ± 9.7                     | 22.2 ± 2.7                            | 7.5 ± 4.9                   |
| <i>S. ratti</i> L3<br>(100 µg/mL)        | 40.2 ± 4.5                    | 7 ± 7.4                        | 39.2 ± 9.9                            | 11 ± 5.6                    |
| <i>T. muris</i> adult<br>(100 µg/mL)     | 40 ± 0                        | 41.65 ± 1.7                    | 58.35 ± 1.7                           | 20 ± 0                      |

\*mortality % based on three replicates; \*\* NTS = newly transformed schistosomula; nt = not tested

**Table S3: Statistical tables for one way ANOVA using Sigma Plot 14.0. ANOVA table for data in figure 1.**

| Source of Variation | DF  | SS         | MS       | F       | P      |
|---------------------|-----|------------|----------|---------|--------|
| Between Groups      | 87  | 177455,140 | 2039,714 | 120,420 | <0,001 |
| Residual            | 176 | 2981,140   | 16,938   |         |        |
| Total               | 263 | 180436,280 |          |         |        |

The differences in the mean values among the treatment groups are greater than would be expected by chance; there is a statistically significant difference (P = <0,001).

All Pairwise Multiple Comparison Procedures (Tukey Test):

Comparisons for factor:

| Comparison        | Diff of Means | p        | q      | P | P<0,050 |
|-------------------|---------------|----------|--------|---|---------|
| Row 33 vs. Row 22 | 99,700        | 8841,959 | <0,001 |   | Yes     |
| Row 33 vs. Row 14 | 96,500        | 8840,612 | <0,001 |   | Yes     |
| Row 33 vs. Row 30 | 95,700        | 8840,275 | <0,001 |   | Yes     |
| Row 33 vs. Row 53 | 93,500        | 8839,349 | <0,001 |   | Yes     |
| Row 33 vs. Row 78 | 93,100        | 8839,181 | <0,001 |   | Yes     |
| Row 33 vs. Row 87 | 93,000        | 8839,139 | <0,001 |   | Yes     |
| Row 33 vs. Row 13 | 92,900        | 8839,097 | <0,001 |   | Yes     |
| Row 33 vs. Row 37 | 92,500        | 8838,928 | <0,001 |   | Yes     |

|                   |        |          |        |     |
|-------------------|--------|----------|--------|-----|
| Row 33 vs. Row 5  | 92,100 | 8838,760 | <0,001 | Yes |
| Row 33 vs. Row 60 | 89,700 | 8837,750 | <0,001 | Yes |
| Row 33 vs. Row 38 | 89,000 | 8837,456 | <0,001 | Yes |
| Row 33 vs. Row 29 | 88,900 | 8837,413 | <0,001 | Yes |
| Row 33 vs. Row 85 | 88,700 | 8837,329 | <0,001 | Yes |
| Row 33 vs. Row 6  | 88,200 | 8837,119 | <0,001 | Yes |
| Row 33 vs. Row 52 | 85,700 | 8836,067 | <0,001 | Yes |
| Row 33 vs. Row 69 | 85,600 | 8836,025 | <0,001 | Yes |
| Row 33 vs. Row 77 | 85,200 | 8835,856 | <0,001 | Yes |
| Row 33 vs. Row 61 | 84,700 | 8835,646 | <0,001 | Yes |
| Row 33 vs. Row 70 | 84,600 | 8835,604 | <0,001 | Yes |
| Row 33 vs. Row 86 | 83,500 | 8835,141 | <0,001 | Yes |
| Row 33 vs. Row 44 | 81,500 | 8834,299 | <0,001 | Yes |
| Row 33 vs. Row 58 | 80,600 | 8833,920 | <0,001 | Yes |
| Row 33 vs. Row 39 | 80,000 | 8833,668 | <0,001 | Yes |
| Row 33 vs. Row 31 | 78,100 | 8832,868 | <0,001 | Yes |
| Row 33 vs. Row 45 | 77,800 | 8832,742 | <0,001 | Yes |
| Row 33 vs. Row 21 | 76,800 | 8832,321 | <0,001 | Yes |
| Row 33 vs. Row 15 | 71,600 | 8830,133 | <0,001 | Yes |
| Row 33 vs. Row 11 | 70,800 | 8829,796 | <0,001 | Yes |
| Row 33 vs. Row 64 | 70,400 | 8829,628 | <0,001 | Yes |
| Row 33 vs. Row 10 | 69,230 | 8829,135 | <0,001 | Yes |
| Row 33 vs. Row 49 | 69,230 | 8829,135 | <0,001 | Yes |
| Row 33 vs. Row 2  | 69,230 | 8829,135 | <0,001 | Yes |
| Row 33 vs. Row 12 | 68,350 | 8828,765 | <0,001 | Yes |
| Row 33 vs. Row 8  | 66,650 | 8828,050 | <0,001 | Yes |
| Row 33 vs. Row 19 | 66,400 | 8827,944 | <0,001 | Yes |
| Row 33 vs. Row 62 | 65,600 | 8827,608 | <0,001 | Yes |
| Row 33 vs. Row 9  | 65,380 | 8827,515 | <0,001 | Yes |
| Row 33 vs. Row 66 | 65,380 | 8827,515 | <0,001 | Yes |
| Row 33 vs. Row 23 | 63,600 | 8826,766 | <0,001 | Yes |
| Row 33 vs. Row 3  | 63,200 | 8826,598 | <0,001 | Yes |
| Row 33 vs. Row 71 | 63,200 | 8826,598 | <0,001 | Yes |
| Row 33 vs. Row 50 | 62,400 | 8826,261 | <0,001 | Yes |
| Row 33 vs. Row 67 | 61,700 | 8825,966 | <0,001 | Yes |
| Row 33 vs. Row 16 | 61,650 | 8825,945 | <0,001 | Yes |
| Row 33 vs. Row 24 | 61,650 | 8825,945 | <0,001 | Yes |
| Row 33 vs. Row 46 | 60,800 | 8825,588 | <0,001 | Yes |
| Row 33 vs. Row 55 | 60,000 | 8825,251 | <0,001 | Yes |
| Row 33 vs. Row 36 | 60,000 | 8825,251 | <0,001 | Yes |
| Row 33 vs. Row 72 | 60,000 | 8825,251 | <0,001 | Yes |
| Row 33 vs. Row 80 | 60,000 | 8825,251 | <0,001 | Yes |
| Row 33 vs. Row 79 | 59,800 | 8825,167 | <0,001 | Yes |
| Row 33 vs. Row 88 | 58,350 | 8824,557 | <0,001 | Yes |
| Row 33 vs. Row 18 | 57,690 | 8824,279 | <0,001 | Yes |
| Row 33 vs. Row 43 | 56,650 | 8823,841 | <0,001 | Yes |
| Row 33 vs. Row 75 | 55,000 | 8823,147 | <0,001 | Yes |
| Row 33 vs. Row 35 | 54,400 | 8822,894 | <0,001 | Yes |
| Row 33 vs. Row 1  | 53,850 | 8822,663 | <0,001 | Yes |
| Row 33 vs. Row 84 | 53,300 | 8822,431 | <0,001 | Yes |
| Row 33 vs. Row 4  | 51,650 | 8821,737 | <0,001 | Yes |
| Row 33 vs. Row 20 | 50,000 | 8821,042 | <0,001 | Yes |
| Row 33 vs. Row 76 | 48,350 | 8820,348 | <0,001 | Yes |
| Row 33 vs. Row 7  | 48,200 | 8820,285 | <0,001 | Yes |
| Row 33 vs. Row 83 | 46,900 | 8819,738 | <0,001 | Yes |
| Row 33 vs. Row 28 | 46,650 | 8819,633 | <0,001 | Yes |
| Row 33 vs. Row 27 | 45,500 | 8819,149 | <0,001 | Yes |
| Row 33 vs. Row 68 | 45,000 | 8818,938 | <0,001 | Yes |
| Row 33 vs. Row 32 | 44,500 | 8818,728 | <0,001 | Yes |
| Row 33 vs. Row 26 | 44,230 | 8818,614 | <0,001 | Yes |
| Row 33 vs. Row 59 | 43,350 | 8818,244 | <0,001 | Yes |
| Row 33 vs. Row 51 | 43,350 | 8818,244 | <0,001 | Yes |
| Row 33 vs. Row 54 | 41,800 | 8817,591 | <0,001 | Yes |
| Row 33 vs. Row 47 | 41,650 | 8817,528 | <0,001 | Yes |
| Row 33 vs. Row 57 | 38,460 | 8816,186 | <0,001 | Yes |
| Row 33 vs. Row 56 | 37,070 | 8815,601 | <0,001 | Yes |

|                   |        |          |        |             |
|-------------------|--------|----------|--------|-------------|
| Row 33 vs. Row 42 | 36,700 | 8815,445 | <0,001 | Yes         |
| Row 33 vs. Row 63 | 33,350 | 8814,035 | <0,001 | Yes         |
| Row 33 vs. Row 41 | 23,080 | 88 9,713 | <0,001 | Yes         |
| Row 33 vs. Row 40 | 19,230 | 88 8,093 | <0,001 | Yes         |
| Row 33 vs. Row 65 | 13,460 | 88 5,665 | 0,117  | No          |
| Row 33 vs. Row 17 | 13,460 | 88 5,665 | 0,117  | Do Not Test |
| Row 33 vs. Row 74 | 9,620  | 88 4,049 | 0,939  | Do Not Test |
| Row 33 vs. Row 48 | 9,620  | 88 4,049 | 0,939  | Do Not Test |
| Row 33 vs. Row 82 | 5,680  | 88 2,390 | 1,000  | Do Not Test |
| Row 33 vs. Row 73 | 3,850  | 88 1,620 | 1,000  | Do Not Test |
| Row 33 vs. Row 81 | 3,850  | 88 1,620 | 1,000  | Do Not Test |
| Row 33 vs. Row 34 | 1,920  | 88 0,808 | 1,000  | Do Not Test |
| Row 33 vs. Row 25 | 0,000  | 88 0,000 | 1,000  | Do Not Test |
| Row 25 vs. Row 22 | 99,700 | 8841,959 | <0,001 | Yes         |
| Row 25 vs. Row 14 | 96,500 | 8840,612 | <0,001 | Yes         |
| Row 25 vs. Row 30 | 95,700 | 8840,275 | <0,001 | Yes         |
| Row 25 vs. Row 53 | 93,500 | 8839,349 | <0,001 | Yes         |
| Row 25 vs. Row 78 | 93,100 | 8839,181 | <0,001 | Yes         |
| Row 25 vs. Row 87 | 93,000 | 8839,139 | <0,001 | Yes         |
| Row 25 vs. Row 13 | 92,900 | 8839,097 | <0,001 | Yes         |
| Row 25 vs. Row 37 | 92,500 | 8838,928 | <0,001 | Yes         |
| Row 25 vs. Row 5  | 92,100 | 8838,760 | <0,001 | Yes         |
| Row 25 vs. Row 60 | 89,700 | 8837,750 | <0,001 | Yes         |
| Row 25 vs. Row 38 | 89,000 | 8837,456 | <0,001 | Yes         |
| Row 25 vs. Row 29 | 88,900 | 8837,413 | <0,001 | Yes         |
| Row 25 vs. Row 85 | 88,700 | 8837,329 | <0,001 | Yes         |
| Row 25 vs. Row 6  | 88,200 | 8837,119 | <0,001 | Yes         |
| Row 25 vs. Row 52 | 85,700 | 8836,067 | <0,001 | Yes         |
| Row 25 vs. Row 69 | 85,600 | 8836,025 | <0,001 | Yes         |
| Row 25 vs. Row 77 | 85,200 | 8835,856 | <0,001 | Yes         |
| Row 25 vs. Row 61 | 84,700 | 8835,646 | <0,001 | Yes         |
| Row 25 vs. Row 70 | 84,600 | 8835,604 | <0,001 | Yes         |
| Row 25 vs. Row 86 | 83,500 | 8835,141 | <0,001 | Yes         |
| Row 25 vs. Row 44 | 81,500 | 8834,299 | <0,001 | Yes         |
| Row 25 vs. Row 58 | 80,600 | 8833,920 | <0,001 | Yes         |
| Row 25 vs. Row 39 | 80,000 | 8833,668 | <0,001 | Yes         |
| Row 25 vs. Row 31 | 78,100 | 8832,868 | <0,001 | Yes         |
| Row 25 vs. Row 45 | 77,800 | 8832,742 | <0,001 | Yes         |
| Row 25 vs. Row 21 | 76,800 | 8832,321 | <0,001 | Yes         |
| Row 25 vs. Row 15 | 71,600 | 8830,133 | <0,001 | Yes         |
| Row 25 vs. Row 11 | 70,800 | 8829,796 | <0,001 | Yes         |
| Row 25 vs. Row 64 | 70,400 | 8829,628 | <0,001 | Yes         |
| Row 25 vs. Row 10 | 69,230 | 8829,135 | <0,001 | Yes         |
| Row 25 vs. Row 49 | 69,230 | 8829,135 | <0,001 | Yes         |
| Row 25 vs. Row 2  | 69,230 | 8829,135 | <0,001 | Yes         |
| Row 25 vs. Row 12 | 68,350 | 8828,765 | <0,001 | Yes         |
| Row 25 vs. Row 8  | 66,650 | 8828,050 | <0,001 | Yes         |
| Row 25 vs. Row 19 | 66,400 | 8827,944 | <0,001 | Yes         |
| Row 25 vs. Row 62 | 65,600 | 8827,608 | <0,001 | Yes         |
| Row 25 vs. Row 9  | 65,380 | 8827,515 | <0,001 | Yes         |
| Row 25 vs. Row 66 | 65,380 | 8827,515 | <0,001 | Yes         |
| Row 25 vs. Row 23 | 63,600 | 8826,766 | <0,001 | Yes         |
| Row 25 vs. Row 3  | 63,200 | 8826,598 | <0,001 | Yes         |
| Row 25 vs. Row 71 | 63,200 | 8826,598 | <0,001 | Yes         |
| Row 25 vs. Row 50 | 62,400 | 8826,261 | <0,001 | Yes         |
| Row 25 vs. Row 67 | 61,700 | 8825,966 | <0,001 | Yes         |
| Row 25 vs. Row 16 | 61,650 | 8825,945 | <0,001 | Yes         |
| Row 25 vs. Row 24 | 61,650 | 8825,945 | <0,001 | Yes         |
| Row 25 vs. Row 46 | 60,800 | 8825,588 | <0,001 | Yes         |
| Row 25 vs. Row 55 | 60,000 | 8825,251 | <0,001 | Yes         |
| Row 25 vs. Row 36 | 60,000 | 8825,251 | <0,001 | Yes         |
| Row 25 vs. Row 72 | 60,000 | 8825,251 | <0,001 | Yes         |
| Row 25 vs. Row 80 | 60,000 | 8825,251 | <0,001 | Yes         |
| Row 25 vs. Row 79 | 59,800 | 8825,167 | <0,001 | Yes         |
| Row 25 vs. Row 88 | 58,350 | 8824,557 | <0,001 | Yes         |
| Row 25 vs. Row 18 | 57,690 | 8824,279 | <0,001 | Yes         |

|                   |        |          |        |             |
|-------------------|--------|----------|--------|-------------|
| Row 25 vs. Row 43 | 56,650 | 8823,841 | <0,001 | Yes         |
| Row 25 vs. Row 75 | 55,000 | 8823,147 | <0,001 | Yes         |
| Row 25 vs. Row 35 | 54,400 | 8822,894 | <0,001 | Yes         |
| Row 25 vs. Row 1  | 53,850 | 8822,663 | <0,001 | Yes         |
| Row 25 vs. Row 84 | 53,300 | 8822,431 | <0,001 | Yes         |
| Row 25 vs. Row 4  | 51,650 | 8821,737 | <0,001 | Yes         |
| Row 25 vs. Row 20 | 50,000 | 8821,042 | <0,001 | Yes         |
| Row 25 vs. Row 76 | 48,350 | 8820,348 | <0,001 | Yes         |
| Row 25 vs. Row 7  | 48,200 | 8820,285 | <0,001 | Yes         |
| Row 25 vs. Row 83 | 46,900 | 8819,738 | <0,001 | Yes         |
| Row 25 vs. Row 28 | 46,650 | 8819,633 | <0,001 | Yes         |
| Row 25 vs. Row 27 | 45,500 | 8819,149 | <0,001 | Yes         |
| Row 25 vs. Row 68 | 45,000 | 8818,938 | <0,001 | Yes         |
| Row 25 vs. Row 32 | 44,500 | 8818,728 | <0,001 | Yes         |
| Row 25 vs. Row 26 | 44,230 | 8818,614 | <0,001 | Yes         |
| Row 25 vs. Row 59 | 43,350 | 8818,244 | <0,001 | Yes         |
| Row 25 vs. Row 51 | 43,350 | 8818,244 | <0,001 | Yes         |
| Row 25 vs. Row 54 | 41,800 | 8817,591 | <0,001 | Yes         |
| Row 25 vs. Row 47 | 41,650 | 8817,528 | <0,001 | Yes         |
| Row 25 vs. Row 57 | 38,460 | 8816,186 | <0,001 | Yes         |
| Row 25 vs. Row 56 | 37,070 | 8815,601 | <0,001 | Yes         |
| Row 25 vs. Row 42 | 36,700 | 8815,445 | <0,001 | Yes         |
| Row 25 vs. Row 63 | 33,350 | 8814,035 | <0,001 | Yes         |
| Row 25 vs. Row 41 | 23,080 | 88 9,713 | <0,001 | Yes         |
| Row 25 vs. Row 40 | 19,230 | 88 8,093 | <0,001 | Yes         |
| Row 25 vs. Row 65 | 13,460 | 88 5,665 | 0,117  | Do Not Test |
| Row 25 vs. Row 17 | 13,460 | 88 5,665 | 0,117  | Do Not Test |
| Row 25 vs. Row 74 | 9,620  | 88 4,049 | 0,939  | Do Not Test |
| Row 25 vs. Row 48 | 9,620  | 88 4,049 | 0,939  | Do Not Test |
| Row 25 vs. Row 82 | 5,680  | 88 2,390 | 1,000  | Do Not Test |
| Row 25 vs. Row 73 | 3,850  | 88 1,620 | 1,000  | Do Not Test |
| Row 25 vs. Row 81 | 3,850  | 88 1,620 | 1,000  | Do Not Test |
| Row 25 vs. Row 34 | 1,920  | 88 0,808 | 1,000  | Do Not Test |
| Row 34 vs. Row 22 | 97,780 | 8841,151 | <0,001 | Yes         |
| Row 34 vs. Row 14 | 94,580 | 8839,804 | <0,001 | Yes         |
| Row 34 vs. Row 30 | 93,780 | 8839,467 | <0,001 | Yes         |
| Row 34 vs. Row 53 | 91,580 | 8838,541 | <0,001 | Yes         |
| Row 34 vs. Row 78 | 91,180 | 8838,373 | <0,001 | Yes         |
| Row 34 vs. Row 87 | 91,080 | 8838,331 | <0,001 | Yes         |
| Row 34 vs. Row 13 | 90,980 | 8838,289 | <0,001 | Yes         |
| Row 34 vs. Row 37 | 90,580 | 8838,120 | <0,001 | Yes         |
| Row 34 vs. Row 5  | 90,180 | 8837,952 | <0,001 | Yes         |
| Row 34 vs. Row 60 | 87,780 | 8836,942 | <0,001 | Yes         |
| Row 34 vs. Row 38 | 87,080 | 8836,647 | <0,001 | Yes         |
| Row 34 vs. Row 29 | 86,980 | 8836,605 | <0,001 | Yes         |
| Row 34 vs. Row 85 | 86,780 | 8836,521 | <0,001 | Yes         |
| Row 34 vs. Row 6  | 86,280 | 8836,311 | <0,001 | Yes         |
| Row 34 vs. Row 52 | 83,780 | 8835,259 | <0,001 | Yes         |
| Row 34 vs. Row 69 | 83,680 | 8835,217 | <0,001 | Yes         |
| Row 34 vs. Row 77 | 83,280 | 8835,048 | <0,001 | Yes         |
| Row 34 vs. Row 61 | 82,780 | 8834,838 | <0,001 | Yes         |
| Row 34 vs. Row 70 | 82,680 | 8834,796 | <0,001 | Yes         |
| Row 34 vs. Row 86 | 81,580 | 8834,333 | <0,001 | Yes         |
| Row 34 vs. Row 44 | 79,580 | 8833,491 | <0,001 | Yes         |
| Row 34 vs. Row 58 | 78,680 | 8833,112 | <0,001 | Yes         |
| Row 34 vs. Row 39 | 78,080 | 8832,860 | <0,001 | Yes         |
| Row 34 vs. Row 31 | 76,180 | 8832,060 | <0,001 | Yes         |
| Row 34 vs. Row 45 | 75,880 | 8831,934 | <0,001 | Yes         |
| Row 34 vs. Row 21 | 74,880 | 8831,513 | <0,001 | Yes         |
| Row 34 vs. Row 15 | 69,680 | 8829,325 | <0,001 | Yes         |
| Row 34 vs. Row 11 | 68,880 | 8828,988 | <0,001 | Yes         |
| Row 34 vs. Row 64 | 68,480 | 8828,820 | <0,001 | Yes         |
| Row 34 vs. Row 10 | 67,310 | 8828,327 | <0,001 | Yes         |
| Row 34 vs. Row 49 | 67,310 | 8828,327 | <0,001 | Yes         |
| Row 34 vs. Row 2  | 67,310 | 8828,327 | <0,001 | Yes         |
| Row 34 vs. Row 12 | 66,430 | 8827,957 | <0,001 | Yes         |

|                   |        |          |        |             |
|-------------------|--------|----------|--------|-------------|
| Row 34 vs. Row 8  | 64,730 | 8827,242 | <0,001 | Yes         |
| Row 34 vs. Row 19 | 64,480 | 8827,136 | <0,001 | Yes         |
| Row 34 vs. Row 62 | 63,680 | 8826,800 | <0,001 | Yes         |
| Row 34 vs. Row 9  | 63,460 | 8826,707 | <0,001 | Yes         |
| Row 34 vs. Row 66 | 63,460 | 8826,707 | <0,001 | Yes         |
| Row 34 vs. Row 23 | 61,680 | 8825,958 | <0,001 | Yes         |
| Row 34 vs. Row 3  | 61,280 | 8825,790 | <0,001 | Yes         |
| Row 34 vs. Row 71 | 61,280 | 8825,790 | <0,001 | Yes         |
| Row 34 vs. Row 50 | 60,480 | 8825,453 | <0,001 | Yes         |
| Row 34 vs. Row 67 | 59,780 | 8825,158 | <0,001 | Yes         |
| Row 34 vs. Row 16 | 59,730 | 8825,137 | <0,001 | Yes         |
| Row 34 vs. Row 24 | 59,730 | 8825,137 | <0,001 | Yes         |
| Row 34 vs. Row 46 | 58,880 | 8824,780 | <0,001 | Yes         |
| Row 34 vs. Row 55 | 58,080 | 8824,443 | <0,001 | Yes         |
| Row 34 vs. Row 36 | 58,080 | 8824,443 | <0,001 | Yes         |
| Row 34 vs. Row 72 | 58,080 | 8824,443 | <0,001 | Yes         |
| Row 34 vs. Row 80 | 58,080 | 8824,443 | <0,001 | Yes         |
| Row 34 vs. Row 79 | 57,880 | 8824,359 | <0,001 | Yes         |
| Row 34 vs. Row 88 | 56,430 | 8823,748 | <0,001 | Yes         |
| Row 34 vs. Row 18 | 55,770 | 8823,471 | <0,001 | Yes         |
| Row 34 vs. Row 43 | 54,730 | 8823,033 | <0,001 | Yes         |
| Row 34 vs. Row 75 | 53,080 | 8822,339 | <0,001 | Yes         |
| Row 34 vs. Row 35 | 52,480 | 8822,086 | <0,001 | Yes         |
| Row 34 vs. Row 1  | 51,930 | 8821,855 | <0,001 | Yes         |
| Row 34 vs. Row 84 | 51,380 | 8821,623 | <0,001 | Yes         |
| Row 34 vs. Row 4  | 49,730 | 8820,929 | <0,001 | Yes         |
| Row 34 vs. Row 20 | 48,080 | 8820,234 | <0,001 | Yes         |
| Row 34 vs. Row 76 | 46,430 | 8819,540 | <0,001 | Yes         |
| Row 34 vs. Row 7  | 46,280 | 8819,477 | <0,001 | Yes         |
| Row 34 vs. Row 83 | 44,980 | 8818,930 | <0,001 | Yes         |
| Row 34 vs. Row 28 | 44,730 | 8818,825 | <0,001 | Yes         |
| Row 34 vs. Row 27 | 43,580 | 8818,341 | <0,001 | Yes         |
| Row 34 vs. Row 68 | 43,080 | 8818,130 | <0,001 | Yes         |
| Row 34 vs. Row 32 | 42,580 | 8817,920 | <0,001 | Yes         |
| Row 34 vs. Row 26 | 42,310 | 8817,806 | <0,001 | Yes         |
| Row 34 vs. Row 59 | 41,430 | 8817,436 | <0,001 | Yes         |
| Row 34 vs. Row 51 | 41,430 | 8817,436 | <0,001 | Yes         |
| Row 34 vs. Row 54 | 39,880 | 8816,783 | <0,001 | Yes         |
| Row 34 vs. Row 47 | 39,730 | 8816,720 | <0,001 | Yes         |
| Row 34 vs. Row 57 | 36,540 | 8815,378 | <0,001 | Yes         |
| Row 34 vs. Row 56 | 35,150 | 8814,793 | <0,001 | Yes         |
| Row 34 vs. Row 42 | 34,780 | 8814,637 | <0,001 | Yes         |
| Row 34 vs. Row 63 | 31,430 | 8813,227 | <0,001 | Yes         |
| Row 34 vs. Row 41 | 21,160 | 88 8,905 | <0,001 | Yes         |
| Row 34 vs. Row 40 | 17,310 | 88 7,285 | <0,001 | Yes         |
| Row 34 vs. Row 65 | 11,540 | 88 4,857 | 0,513  | Do Not Test |
| Row 34 vs. Row 17 | 11,540 | 88 4,857 | 0,513  | Do Not Test |
| Row 34 vs. Row 74 | 7,700  | 88 3,241 | 1,000  | Do Not Test |
| Row 34 vs. Row 48 | 7,700  | 88 3,241 | 1,000  | Do Not Test |
| Row 34 vs. Row 82 | 3,760  | 88 1,582 | 1,000  | Do Not Test |
| Row 34 vs. Row 73 | 1,930  | 88 0,812 | 1,000  | Do Not Test |
| Row 34 vs. Row 81 | 1,930  | 88 0,812 | 1,000  | Do Not Test |
| Row 81 vs. Row 22 | 95,850 | 8840,338 | <0,001 | Yes         |
| Row 81 vs. Row 14 | 92,650 | 8838,992 | <0,001 | Yes         |
| Row 81 vs. Row 30 | 91,850 | 8838,655 | <0,001 | Yes         |
| Row 81 vs. Row 53 | 89,650 | 8837,729 | <0,001 | Yes         |
| Row 81 vs. Row 78 | 89,250 | 8837,561 | <0,001 | Yes         |
| Row 81 vs. Row 87 | 89,150 | 8837,519 | <0,001 | Yes         |
| Row 81 vs. Row 13 | 89,050 | 8837,477 | <0,001 | Yes         |
| Row 81 vs. Row 37 | 88,650 | 8837,308 | <0,001 | Yes         |
| Row 81 vs. Row 5  | 88,250 | 8837,140 | <0,001 | Yes         |
| Row 81 vs. Row 60 | 85,850 | 8836,130 | <0,001 | Yes         |
| Row 81 vs. Row 38 | 85,150 | 8835,835 | <0,001 | Yes         |
| Row 81 vs. Row 29 | 85,050 | 8835,793 | <0,001 | Yes         |
| Row 81 vs. Row 85 | 84,850 | 8835,709 | <0,001 | Yes         |
| Row 81 vs. Row 6  | 84,350 | 8835,499 | <0,001 | Yes         |

|                   |        |          |        |             |
|-------------------|--------|----------|--------|-------------|
| Row 81 vs. Row 52 | 81,850 | 8834,446 | <0,001 | Yes         |
| Row 81 vs. Row 69 | 81,750 | 8834,404 | <0,001 | Yes         |
| Row 81 vs. Row 77 | 81,350 | 8834,236 | <0,001 | Yes         |
| Row 81 vs. Row 61 | 80,850 | 8834,026 | <0,001 | Yes         |
| Row 81 vs. Row 70 | 80,750 | 8833,984 | <0,001 | Yes         |
| Row 81 vs. Row 86 | 79,650 | 8833,521 | <0,001 | Yes         |
| Row 81 vs. Row 44 | 77,650 | 8832,679 | <0,001 | Yes         |
| Row 81 vs. Row 58 | 76,750 | 8832,300 | <0,001 | Yes         |
| Row 81 vs. Row 39 | 76,150 | 8832,048 | <0,001 | Yes         |
| Row 81 vs. Row 31 | 74,250 | 8831,248 | <0,001 | Yes         |
| Row 81 vs. Row 45 | 73,950 | 8831,122 | <0,001 | Yes         |
| Row 81 vs. Row 21 | 72,950 | 8830,701 | <0,001 | Yes         |
| Row 81 vs. Row 15 | 67,750 | 8828,512 | <0,001 | Yes         |
| Row 81 vs. Row 11 | 66,950 | 8828,176 | <0,001 | Yes         |
| Row 81 vs. Row 64 | 66,550 | 8828,007 | <0,001 | Yes         |
| Row 81 vs. Row 10 | 65,380 | 8827,515 | <0,001 | Yes         |
| Row 81 vs. Row 49 | 65,380 | 8827,515 | <0,001 | Yes         |
| Row 81 vs. Row 2  | 65,380 | 8827,515 | <0,001 | Yes         |
| Row 81 vs. Row 12 | 64,500 | 8827,145 | <0,001 | Yes         |
| Row 81 vs. Row 8  | 62,800 | 8826,429 | <0,001 | Yes         |
| Row 81 vs. Row 19 | 62,550 | 8826,324 | <0,001 | Yes         |
| Row 81 vs. Row 62 | 61,750 | 8825,987 | <0,001 | Yes         |
| Row 81 vs. Row 9  | 61,530 | 8825,895 | <0,001 | Yes         |
| Row 81 vs. Row 66 | 61,530 | 8825,895 | <0,001 | Yes         |
| Row 81 vs. Row 23 | 59,750 | 8825,146 | <0,001 | Yes         |
| Row 81 vs. Row 3  | 59,350 | 8824,977 | <0,001 | Yes         |
| Row 81 vs. Row 71 | 59,350 | 8824,977 | <0,001 | Yes         |
| Row 81 vs. Row 50 | 58,550 | 8824,641 | <0,001 | Yes         |
| Row 81 vs. Row 67 | 57,850 | 8824,346 | <0,001 | Yes         |
| Row 81 vs. Row 16 | 57,800 | 8824,325 | <0,001 | Yes         |
| Row 81 vs. Row 24 | 57,800 | 8824,325 | <0,001 | Yes         |
| Row 81 vs. Row 46 | 56,950 | 8823,967 | <0,001 | Yes         |
| Row 81 vs. Row 55 | 56,150 | 8823,631 | <0,001 | Yes         |
| Row 81 vs. Row 36 | 56,150 | 8823,631 | <0,001 | Yes         |
| Row 81 vs. Row 72 | 56,150 | 8823,631 | <0,001 | Yes         |
| Row 81 vs. Row 80 | 56,150 | 8823,631 | <0,001 | Yes         |
| Row 81 vs. Row 79 | 55,950 | 8823,546 | <0,001 | Yes         |
| Row 81 vs. Row 88 | 54,500 | 8822,936 | <0,001 | Yes         |
| Row 81 vs. Row 18 | 53,840 | 8822,658 | <0,001 | Yes         |
| Row 81 vs. Row 43 | 52,800 | 8822,221 | <0,001 | Yes         |
| Row 81 vs. Row 75 | 51,150 | 8821,526 | <0,001 | Yes         |
| Row 81 vs. Row 35 | 50,550 | 8821,274 | <0,001 | Yes         |
| Row 81 vs. Row 1  | 50,000 | 8821,042 | <0,001 | Yes         |
| Row 81 vs. Row 84 | 49,450 | 8820,811 | <0,001 | Yes         |
| Row 81 vs. Row 4  | 47,800 | 8820,117 | <0,001 | Yes         |
| Row 81 vs. Row 20 | 46,150 | 8819,422 | <0,001 | Yes         |
| Row 81 vs. Row 76 | 44,500 | 8818,728 | <0,001 | Yes         |
| Row 81 vs. Row 7  | 44,350 | 8818,665 | <0,001 | Yes         |
| Row 81 vs. Row 83 | 43,050 | 8818,118 | <0,001 | Yes         |
| Row 81 vs. Row 28 | 42,800 | 8818,012 | <0,001 | Yes         |
| Row 81 vs. Row 27 | 41,650 | 8817,528 | <0,001 | Yes         |
| Row 81 vs. Row 68 | 41,150 | 8817,318 | <0,001 | Yes         |
| Row 81 vs. Row 32 | 40,650 | 8817,107 | <0,001 | Yes         |
| Row 81 vs. Row 26 | 40,380 | 8816,994 | <0,001 | Yes         |
| Row 81 vs. Row 59 | 39,500 | 8816,624 | <0,001 | Yes         |
| Row 81 vs. Row 51 | 39,500 | 8816,624 | <0,001 | Yes         |
| Row 81 vs. Row 54 | 37,950 | 8815,971 | <0,001 | Yes         |
| Row 81 vs. Row 47 | 37,800 | 8815,908 | <0,001 | Yes         |
| Row 81 vs. Row 57 | 34,610 | 8814,566 | <0,001 | Yes         |
| Row 81 vs. Row 56 | 33,220 | 8813,981 | <0,001 | Yes         |
| Row 81 vs. Row 42 | 32,850 | 8813,825 | <0,001 | Yes         |
| Row 81 vs. Row 63 | 29,500 | 8812,415 | <0,001 | Yes         |
| Row 81 vs. Row 41 | 19,230 | 88 8,093 | <0,001 | Yes         |
| Row 81 vs. Row 40 | 15,380 | 88 6,473 | 0,013  | Yes         |
| Row 81 vs. Row 65 | 9,610  | 88 4,044 | 0,940  | Do Not Test |
| Row 81 vs. Row 17 | 9,610  | 88 4,044 | 0,940  | Do Not Test |

|                   |        |          |        |             |
|-------------------|--------|----------|--------|-------------|
| Row 81 vs. Row 74 | 5,770  | 88 2,428 | 1,000  | Do Not Test |
| Row 81 vs. Row 48 | 5,770  | 88 2,428 | 1,000  | Do Not Test |
| Row 81 vs. Row 82 | 1,830  | 88 0,770 | 1,000  | Do Not Test |
| Row 81 vs. Row 73 | 0,000  | 88 0,000 | 1,000  | Do Not Test |
| Row 73 vs. Row 22 | 95,850 | 8840,338 | <0,001 | Yes         |
| Row 73 vs. Row 14 | 92,650 | 8838,992 | <0,001 | Yes         |
| Row 73 vs. Row 30 | 91,850 | 8838,655 | <0,001 | Yes         |
| Row 73 vs. Row 53 | 89,650 | 8837,729 | <0,001 | Yes         |
| Row 73 vs. Row 78 | 89,250 | 8837,561 | <0,001 | Yes         |
| Row 73 vs. Row 87 | 89,150 | 8837,519 | <0,001 | Yes         |
| Row 73 vs. Row 13 | 89,050 | 8837,477 | <0,001 | Yes         |
| Row 73 vs. Row 37 | 88,650 | 8837,308 | <0,001 | Yes         |
| Row 73 vs. Row 5  | 88,250 | 8837,140 | <0,001 | Yes         |
| Row 73 vs. Row 60 | 85,850 | 8836,130 | <0,001 | Yes         |
| Row 73 vs. Row 38 | 85,150 | 8835,835 | <0,001 | Yes         |
| Row 73 vs. Row 29 | 85,050 | 8835,793 | <0,001 | Yes         |
| Row 73 vs. Row 85 | 84,850 | 8835,709 | <0,001 | Yes         |
| Row 73 vs. Row 6  | 84,350 | 8835,499 | <0,001 | Yes         |
| Row 73 vs. Row 52 | 81,850 | 8834,446 | <0,001 | Yes         |
| Row 73 vs. Row 69 | 81,750 | 8834,404 | <0,001 | Yes         |
| Row 73 vs. Row 77 | 81,350 | 8834,236 | <0,001 | Yes         |
| Row 73 vs. Row 61 | 80,850 | 8834,026 | <0,001 | Yes         |
| Row 73 vs. Row 70 | 80,750 | 8833,984 | <0,001 | Yes         |
| Row 73 vs. Row 86 | 79,650 | 8833,521 | <0,001 | Yes         |
| Row 73 vs. Row 44 | 77,650 | 8832,679 | <0,001 | Yes         |
| Row 73 vs. Row 58 | 76,750 | 8832,300 | <0,001 | Yes         |
| Row 73 vs. Row 39 | 76,150 | 8832,048 | <0,001 | Yes         |
| Row 73 vs. Row 31 | 74,250 | 8831,248 | <0,001 | Yes         |
| Row 73 vs. Row 45 | 73,950 | 8831,122 | <0,001 | Yes         |
| Row 73 vs. Row 21 | 72,950 | 8830,701 | <0,001 | Yes         |
| Row 73 vs. Row 15 | 67,750 | 8828,512 | <0,001 | Yes         |
| Row 73 vs. Row 11 | 66,950 | 8828,176 | <0,001 | Yes         |
| Row 73 vs. Row 64 | 66,550 | 8828,007 | <0,001 | Yes         |
| Row 73 vs. Row 10 | 65,380 | 8827,515 | <0,001 | Yes         |
| Row 73 vs. Row 49 | 65,380 | 8827,515 | <0,001 | Yes         |
| Row 73 vs. Row 2  | 65,380 | 8827,515 | <0,001 | Yes         |
| Row 73 vs. Row 12 | 64,500 | 8827,145 | <0,001 | Yes         |
| Row 73 vs. Row 8  | 62,800 | 8826,429 | <0,001 | Yes         |
| Row 73 vs. Row 19 | 62,550 | 8826,324 | <0,001 | Yes         |
| Row 73 vs. Row 62 | 61,750 | 8825,987 | <0,001 | Yes         |
| Row 73 vs. Row 9  | 61,530 | 8825,895 | <0,001 | Yes         |
| Row 73 vs. Row 66 | 61,530 | 8825,895 | <0,001 | Yes         |
| Row 73 vs. Row 23 | 59,750 | 8825,146 | <0,001 | Yes         |
| Row 73 vs. Row 3  | 59,350 | 8824,977 | <0,001 | Yes         |
| Row 73 vs. Row 71 | 59,350 | 8824,977 | <0,001 | Yes         |
| Row 73 vs. Row 50 | 58,550 | 8824,641 | <0,001 | Yes         |
| Row 73 vs. Row 67 | 57,850 | 8824,346 | <0,001 | Yes         |
| Row 73 vs. Row 16 | 57,800 | 8824,325 | <0,001 | Yes         |
| Row 73 vs. Row 24 | 57,800 | 8824,325 | <0,001 | Yes         |
| Row 73 vs. Row 46 | 56,950 | 8823,967 | <0,001 | Yes         |
| Row 73 vs. Row 55 | 56,150 | 8823,631 | <0,001 | Yes         |
| Row 73 vs. Row 36 | 56,150 | 8823,631 | <0,001 | Yes         |
| Row 73 vs. Row 72 | 56,150 | 8823,631 | <0,001 | Yes         |
| Row 73 vs. Row 80 | 56,150 | 8823,631 | <0,001 | Yes         |
| Row 73 vs. Row 79 | 55,950 | 8823,546 | <0,001 | Yes         |
| Row 73 vs. Row 88 | 54,500 | 8822,936 | <0,001 | Yes         |
| Row 73 vs. Row 18 | 53,840 | 8822,658 | <0,001 | Yes         |
| Row 73 vs. Row 43 | 52,800 | 8822,221 | <0,001 | Yes         |
| Row 73 vs. Row 75 | 51,150 | 8821,526 | <0,001 | Yes         |
| Row 73 vs. Row 35 | 50,550 | 8821,274 | <0,001 | Yes         |
| Row 73 vs. Row 1  | 50,000 | 8821,042 | <0,001 | Yes         |
| Row 73 vs. Row 84 | 49,450 | 8820,811 | <0,001 | Yes         |
| Row 73 vs. Row 4  | 47,800 | 8820,117 | <0,001 | Yes         |
| Row 73 vs. Row 20 | 46,150 | 8819,422 | <0,001 | Yes         |
| Row 73 vs. Row 76 | 44,500 | 8818,728 | <0,001 | Yes         |
| Row 73 vs. Row 7  | 44,350 | 8818,665 | <0,001 | Yes         |



|                   |        |          |        |             |
|-------------------|--------|----------|--------|-------------|
| Row 73 vs. Row 83 | 43,050 | 8818,118 | <0,001 | Yes         |
| Row 73 vs. Row 28 | 42,800 | 8818,012 | <0,001 | Yes         |
| Row 73 vs. Row 27 | 41,650 | 8817,528 | <0,001 | Yes         |
| Row 73 vs. Row 68 | 41,150 | 8817,318 | <0,001 | Yes         |
| Row 73 vs. Row 32 | 40,650 | 8817,107 | <0,001 | Yes         |
| Row 73 vs. Row 26 | 40,380 | 8816,994 | <0,001 | Yes         |
| Row 73 vs. Row 59 | 39,500 | 8816,624 | <0,001 | Yes         |
| Row 73 vs. Row 51 | 39,500 | 8816,624 | <0,001 | Yes         |
| Row 73 vs. Row 54 | 37,950 | 8815,971 | <0,001 | Yes         |
| Row 73 vs. Row 47 | 37,800 | 8815,908 | <0,001 | Yes         |
| Row 73 vs. Row 57 | 34,610 | 8814,566 | <0,001 | Yes         |
| Row 73 vs. Row 56 | 33,220 | 8813,981 | <0,001 | Yes         |
| Row 73 vs. Row 42 | 32,850 | 8813,825 | <0,001 | Yes         |
| Row 73 vs. Row 63 | 29,500 | 8812,415 | <0,001 | Yes         |
| Row 73 vs. Row 41 | 19,230 | 88 8,093 | <0,001 | Yes         |
| Row 73 vs. Row 40 | 15,380 | 88 6,473 | 0,013  | Yes         |
| Row 73 vs. Row 65 | 9,610  | 88 4,044 | 0,940  | Do Not Test |
| Row 73 vs. Row 17 | 9,610  | 88 4,044 | 0,940  | Do Not Test |
| Row 73 vs. Row 74 | 5,770  | 88 2,428 | 1,000  | Do Not Test |
| Row 73 vs. Row 48 | 5,770  | 88 2,428 | 1,000  | Do Not Test |
| Row 73 vs. Row 82 | 1,830  | 88 0,770 | 1,000  | Do Not Test |
| Row 82 vs. Row 22 | 94,020 | 8839,568 | <0,001 | Yes         |
| Row 82 vs. Row 14 | 90,820 | 8838,221 | <0,001 | Yes         |
| Row 82 vs. Row 30 | 90,020 | 8837,885 | <0,001 | Yes         |
| Row 82 vs. Row 53 | 87,820 | 8836,959 | <0,001 | Yes         |
| Row 82 vs. Row 78 | 87,420 | 8836,791 | <0,001 | Yes         |
| Row 82 vs. Row 87 | 87,320 | 8836,748 | <0,001 | Yes         |
| Row 82 vs. Row 13 | 87,220 | 8836,706 | <0,001 | Yes         |
| Row 82 vs. Row 37 | 86,820 | 8836,538 | <0,001 | Yes         |
| Row 82 vs. Row 5  | 86,420 | 8836,370 | <0,001 | Yes         |
| Row 82 vs. Row 60 | 84,020 | 8835,360 | <0,001 | Yes         |
| Row 82 vs. Row 38 | 83,320 | 8835,065 | <0,001 | Yes         |
| Row 82 vs. Row 29 | 83,220 | 8835,023 | <0,001 | Yes         |
| Row 82 vs. Row 85 | 83,020 | 8834,939 | <0,001 | Yes         |
| Row 82 vs. Row 6  | 82,520 | 8834,728 | <0,001 | Yes         |
| Row 82 vs. Row 52 | 80,020 | 8833,676 | <0,001 | Yes         |
| Row 82 vs. Row 69 | 79,920 | 8833,634 | <0,001 | Yes         |
| Row 82 vs. Row 77 | 79,520 | 8833,466 | <0,001 | Yes         |
| Row 82 vs. Row 61 | 79,020 | 8833,255 | <0,001 | Yes         |
| Row 82 vs. Row 70 | 78,920 | 8833,213 | <0,001 | Yes         |
| Row 82 vs. Row 86 | 77,820 | 8832,750 | <0,001 | Yes         |
| Row 82 vs. Row 44 | 75,820 | 8831,909 | <0,001 | Yes         |
| Row 82 vs. Row 58 | 74,920 | 8831,530 | <0,001 | Yes         |
| Row 82 vs. Row 39 | 74,320 | 8831,277 | <0,001 | Yes         |
| Row 82 vs. Row 31 | 72,420 | 8830,478 | <0,001 | Yes         |
| Row 82 vs. Row 45 | 72,120 | 8830,352 | <0,001 | Yes         |
| Row 82 vs. Row 21 | 71,120 | 8829,931 | <0,001 | Yes         |
| Row 82 vs. Row 15 | 65,920 | 8827,742 | <0,001 | Yes         |
| Row 82 vs. Row 11 | 65,120 | 8827,406 | <0,001 | Yes         |
| Row 82 vs. Row 64 | 64,720 | 8827,237 | <0,001 | Yes         |
| Row 82 vs. Row 10 | 63,550 | 8826,745 | <0,001 | Yes         |
| Row 82 vs. Row 49 | 63,550 | 8826,745 | <0,001 | Yes         |
| Row 82 vs. Row 2  | 63,550 | 8826,745 | <0,001 | Yes         |
| Row 82 vs. Row 12 | 62,670 | 8826,375 | <0,001 | Yes         |
| Row 82 vs. Row 8  | 60,970 | 8825,659 | <0,001 | Yes         |
| Row 82 vs. Row 19 | 60,720 | 8825,554 | <0,001 | Yes         |
| Row 82 vs. Row 62 | 59,920 | 8825,217 | <0,001 | Yes         |
| Row 82 vs. Row 9  | 59,700 | 8825,125 | <0,001 | Yes         |
| Row 82 vs. Row 66 | 59,700 | 8825,125 | <0,001 | Yes         |
| Row 82 vs. Row 23 | 57,920 | 8824,376 | <0,001 | Yes         |
| Row 82 vs. Row 3  | 57,520 | 8824,207 | <0,001 | Yes         |
| Row 82 vs. Row 71 | 57,520 | 8824,207 | <0,001 | Yes         |
| Row 82 vs. Row 50 | 56,720 | 8823,871 | <0,001 | Yes         |
| Row 82 vs. Row 67 | 56,020 | 8823,576 | <0,001 | Yes         |
| Row 82 vs. Row 16 | 55,970 | 8823,555 | <0,001 | Yes         |
| Row 82 vs. Row 24 | 55,970 | 8823,555 | <0,001 | Yes         |

|                   |        |          |        |             |
|-------------------|--------|----------|--------|-------------|
| Row 82 vs. Row 46 | 55,120 | 8823,197 | <0,001 | Yes         |
| Row 82 vs. Row 55 | 54,320 | 8822,860 | <0,001 | Yes         |
| Row 82 vs. Row 36 | 54,320 | 8822,860 | <0,001 | Yes         |
| Row 82 vs. Row 72 | 54,320 | 8822,860 | <0,001 | Yes         |
| Row 82 vs. Row 80 | 54,320 | 8822,860 | <0,001 | Yes         |
| Row 82 vs. Row 79 | 54,120 | 8822,776 | <0,001 | Yes         |
| Row 82 vs. Row 88 | 52,670 | 8822,166 | <0,001 | Yes         |
| Row 82 vs. Row 18 | 52,010 | 8821,888 | <0,001 | Yes         |
| Row 82 vs. Row 43 | 50,970 | 8821,451 | <0,001 | Yes         |
| Row 82 vs. Row 75 | 49,320 | 8820,756 | <0,001 | Yes         |
| Row 82 vs. Row 35 | 48,720 | 8820,504 | <0,001 | Yes         |
| Row 82 vs. Row 1  | 48,170 | 8820,272 | <0,001 | Yes         |
| Row 82 vs. Row 84 | 47,620 | 8820,041 | <0,001 | Yes         |
| Row 82 vs. Row 4  | 45,970 | 8819,346 | <0,001 | Yes         |
| Row 82 vs. Row 20 | 44,320 | 8818,652 | <0,001 | Yes         |
| Row 82 vs. Row 76 | 42,670 | 8817,958 | <0,001 | Yes         |
| Row 82 vs. Row 7  | 42,520 | 8817,894 | <0,001 | Yes         |
| Row 82 vs. Row 83 | 41,220 | 8817,347 | <0,001 | Yes         |
| Row 82 vs. Row 28 | 40,970 | 8817,242 | <0,001 | Yes         |
| Row 82 vs. Row 27 | 39,820 | 8816,758 | <0,001 | Yes         |
| Row 82 vs. Row 68 | 39,320 | 8816,548 | <0,001 | Yes         |
| Row 82 vs. Row 32 | 38,820 | 8816,337 | <0,001 | Yes         |
| Row 82 vs. Row 26 | 38,550 | 8816,224 | <0,001 | Yes         |
| Row 82 vs. Row 59 | 37,670 | 8815,853 | <0,001 | Yes         |
| Row 82 vs. Row 51 | 37,670 | 8815,853 | <0,001 | Yes         |
| Row 82 vs. Row 54 | 36,120 | 8815,201 | <0,001 | Yes         |
| Row 82 vs. Row 47 | 35,970 | 8815,138 | <0,001 | Yes         |
| Row 82 vs. Row 57 | 32,780 | 8813,795 | <0,001 | Yes         |
| Row 82 vs. Row 56 | 31,390 | 8813,210 | <0,001 | Yes         |
| Row 82 vs. Row 42 | 31,020 | 8813,055 | <0,001 | Yes         |
| Row 82 vs. Row 63 | 27,670 | 8811,645 | <0,001 | Yes         |
| Row 82 vs. Row 41 | 17,400 | 88 7,323 | <0,001 | Yes         |
| Row 82 vs. Row 40 | 13,550 | 88 5,702 | 0,107  | No          |
| Row 82 vs. Row 65 | 7,780  | 88 3,274 | 1,000  | Do Not Test |
| Row 82 vs. Row 17 | 7,780  | 88 3,274 | 1,000  | Do Not Test |
| Row 82 vs. Row 74 | 3,940  | 88 1,658 | 1,000  | Do Not Test |
| Row 82 vs. Row 48 | 3,940  | 88 1,658 | 1,000  | Do Not Test |
| Row 48 vs. Row 22 | 90,080 | 8837,910 | <0,001 | Yes         |
| Row 48 vs. Row 14 | 86,880 | 8836,563 | <0,001 | Yes         |
| Row 48 vs. Row 30 | 86,080 | 8836,227 | <0,001 | Yes         |
| Row 48 vs. Row 53 | 83,880 | 8835,301 | <0,001 | Yes         |
| Row 48 vs. Row 78 | 83,480 | 8835,132 | <0,001 | Yes         |
| Row 48 vs. Row 87 | 83,380 | 8835,090 | <0,001 | Yes         |
| Row 48 vs. Row 13 | 83,280 | 8835,048 | <0,001 | Yes         |
| Row 48 vs. Row 37 | 82,880 | 8834,880 | <0,001 | Yes         |
| Row 48 vs. Row 5  | 82,480 | 8834,712 | <0,001 | Yes         |
| Row 48 vs. Row 60 | 80,080 | 8833,702 | <0,001 | Yes         |
| Row 48 vs. Row 38 | 79,380 | 8833,407 | <0,001 | Yes         |
| Row 48 vs. Row 29 | 79,280 | 8833,365 | <0,001 | Yes         |
| Row 48 vs. Row 85 | 79,080 | 8833,281 | <0,001 | Yes         |
| Row 48 vs. Row 6  | 78,580 | 8833,070 | <0,001 | Yes         |
| Row 48 vs. Row 52 | 76,080 | 8832,018 | <0,001 | Yes         |
| Row 48 vs. Row 69 | 75,980 | 8831,976 | <0,001 | Yes         |
| Row 48 vs. Row 77 | 75,580 | 8831,808 | <0,001 | Yes         |
| Row 48 vs. Row 61 | 75,080 | 8831,597 | <0,001 | Yes         |
| Row 48 vs. Row 70 | 74,980 | 8831,555 | <0,001 | Yes         |
| Row 48 vs. Row 86 | 73,880 | 8831,092 | <0,001 | Yes         |
| Row 48 vs. Row 44 | 71,880 | 8830,251 | <0,001 | Yes         |
| Row 48 vs. Row 58 | 70,980 | 8829,872 | <0,001 | Yes         |
| Row 48 vs. Row 39 | 70,380 | 8829,619 | <0,001 | Yes         |
| Row 48 vs. Row 31 | 68,480 | 8828,820 | <0,001 | Yes         |
| Row 48 vs. Row 45 | 68,180 | 8828,693 | <0,001 | Yes         |
| Row 48 vs. Row 21 | 67,180 | 8828,273 | <0,001 | Yes         |
| Row 48 vs. Row 15 | 61,980 | 8826,084 | <0,001 | Yes         |
| Row 48 vs. Row 11 | 61,180 | 8825,748 | <0,001 | Yes         |
| Row 48 vs. Row 64 | 60,780 | 8825,579 | <0,001 | Yes         |

|                   |        |          |        |             |
|-------------------|--------|----------|--------|-------------|
| Row 48 vs. Row 10 | 59,610 | 8825,087 | <0,001 | Yes         |
| Row 48 vs. Row 49 | 59,610 | 8825,087 | <0,001 | Yes         |
| Row 48 vs. Row 2  | 59,610 | 8825,087 | <0,001 | Yes         |
| Row 48 vs. Row 12 | 58,730 | 8824,716 | <0,001 | Yes         |
| Row 48 vs. Row 8  | 57,030 | 8824,001 | <0,001 | Yes         |
| Row 48 vs. Row 19 | 56,780 | 8823,896 | <0,001 | Yes         |
| Row 48 vs. Row 62 | 55,980 | 8823,559 | <0,001 | Yes         |
| Row 48 vs. Row 9  | 55,760 | 8823,467 | <0,001 | Yes         |
| Row 48 vs. Row 66 | 55,760 | 8823,467 | <0,001 | Yes         |
| Row 48 vs. Row 23 | 53,980 | 8822,717 | <0,001 | Yes         |
| Row 48 vs. Row 3  | 53,580 | 8822,549 | <0,001 | Yes         |
| Row 48 vs. Row 71 | 53,580 | 8822,549 | <0,001 | Yes         |
| Row 48 vs. Row 50 | 52,780 | 8822,212 | <0,001 | Yes         |
| Row 48 vs. Row 67 | 52,080 | 8821,918 | <0,001 | Yes         |
| Row 48 vs. Row 16 | 52,030 | 8821,897 | <0,001 | Yes         |
| Row 48 vs. Row 24 | 52,030 | 8821,897 | <0,001 | Yes         |
| Row 48 vs. Row 46 | 51,180 | 8821,539 | <0,001 | Yes         |
| Row 48 vs. Row 55 | 50,380 | 8821,202 | <0,001 | Yes         |
| Row 48 vs. Row 36 | 50,380 | 8821,202 | <0,001 | Yes         |
| Row 48 vs. Row 72 | 50,380 | 8821,202 | <0,001 | Yes         |
| Row 48 vs. Row 80 | 50,380 | 8821,202 | <0,001 | Yes         |
| Row 48 vs. Row 79 | 50,180 | 8821,118 | <0,001 | Yes         |
| Row 48 vs. Row 88 | 48,730 | 8820,508 | <0,001 | Yes         |
| Row 48 vs. Row 18 | 48,070 | 8820,230 | <0,001 | Yes         |
| Row 48 vs. Row 43 | 47,030 | 8819,793 | <0,001 | Yes         |
| Row 48 vs. Row 75 | 45,380 | 8819,098 | <0,001 | Yes         |
| Row 48 vs. Row 35 | 44,780 | 8818,846 | <0,001 | Yes         |
| Row 48 vs. Row 1  | 44,230 | 8818,614 | <0,001 | Yes         |
| Row 48 vs. Row 84 | 43,680 | 8818,383 | <0,001 | Yes         |
| Row 48 vs. Row 4  | 42,030 | 8817,688 | <0,001 | Yes         |
| Row 48 vs. Row 20 | 40,380 | 8816,994 | <0,001 | Yes         |
| Row 48 vs. Row 76 | 38,730 | 8816,299 | <0,001 | Yes         |
| Row 48 vs. Row 7  | 38,580 | 8816,236 | <0,001 | Yes         |
| Row 48 vs. Row 83 | 37,280 | 8815,689 | <0,001 | Yes         |
| Row 48 vs. Row 28 | 37,030 | 8815,584 | <0,001 | Yes         |
| Row 48 vs. Row 27 | 35,880 | 8815,100 | <0,001 | Yes         |
| Row 48 vs. Row 68 | 35,380 | 8814,890 | <0,001 | Yes         |
| Row 48 vs. Row 32 | 34,880 | 8814,679 | <0,001 | Yes         |
| Row 48 vs. Row 26 | 34,610 | 8814,566 | <0,001 | Yes         |
| Row 48 vs. Row 59 | 33,730 | 8814,195 | <0,001 | Yes         |
| Row 48 vs. Row 51 | 33,730 | 8814,195 | <0,001 | Yes         |
| Row 48 vs. Row 54 | 32,180 | 8813,543 | <0,001 | Yes         |
| Row 48 vs. Row 47 | 32,030 | 8813,480 | <0,001 | Yes         |
| Row 48 vs. Row 57 | 28,840 | 8812,137 | <0,001 | Yes         |
| Row 48 vs. Row 56 | 27,450 | 8811,552 | <0,001 | Yes         |
| Row 48 vs. Row 42 | 27,080 | 8811,397 | <0,001 | Yes         |
| Row 48 vs. Row 63 | 23,730 | 88 9,987 | <0,001 | Yes         |
| Row 48 vs. Row 41 | 13,460 | 88 5,665 | 0,117  | No          |
| Row 48 vs. Row 40 | 9,610  | 88 4,044 | 0,940  | Do Not Test |
| Row 48 vs. Row 65 | 3,840  | 88 1,616 | 1,000  | Do Not Test |
| Row 48 vs. Row 17 | 3,840  | 88 1,616 | 1,000  | Do Not Test |
| Row 48 vs. Row 74 | 0,000  | 88 0,000 | 1,000  | Do Not Test |
| Row 74 vs. Row 22 | 90,080 | 8837,910 | <0,001 | Yes         |
| Row 74 vs. Row 14 | 86,880 | 8836,563 | <0,001 | Yes         |
| Row 74 vs. Row 30 | 86,080 | 8836,227 | <0,001 | Yes         |
| Row 74 vs. Row 53 | 83,880 | 8835,301 | <0,001 | Yes         |
| Row 74 vs. Row 78 | 83,480 | 8835,132 | <0,001 | Yes         |
| Row 74 vs. Row 87 | 83,380 | 8835,090 | <0,001 | Yes         |
| Row 74 vs. Row 13 | 83,280 | 8835,048 | <0,001 | Yes         |
| Row 74 vs. Row 37 | 82,880 | 8834,880 | <0,001 | Yes         |
| Row 74 vs. Row 5  | 82,480 | 8834,712 | <0,001 | Yes         |
| Row 74 vs. Row 60 | 80,080 | 8833,702 | <0,001 | Yes         |
| Row 74 vs. Row 38 | 79,380 | 8833,407 | <0,001 | Yes         |
| Row 74 vs. Row 29 | 79,280 | 8833,365 | <0,001 | Yes         |
| Row 74 vs. Row 85 | 79,080 | 8833,281 | <0,001 | Yes         |
| Row 74 vs. Row 6  | 78,580 | 8833,070 | <0,001 | Yes         |

|                   |        |          |        |             |
|-------------------|--------|----------|--------|-------------|
| Row 74 vs. Row 52 | 76,080 | 8832,018 | <0,001 | Yes         |
| Row 74 vs. Row 69 | 75,980 | 8831,976 | <0,001 | Yes         |
| Row 74 vs. Row 77 | 75,580 | 8831,808 | <0,001 | Yes         |
| Row 74 vs. Row 61 | 75,080 | 8831,597 | <0,001 | Yes         |
| Row 74 vs. Row 70 | 74,980 | 8831,555 | <0,001 | Yes         |
| Row 74 vs. Row 86 | 73,880 | 8831,092 | <0,001 | Yes         |
| Row 74 vs. Row 44 | 71,880 | 8830,251 | <0,001 | Yes         |
| Row 74 vs. Row 58 | 70,980 | 8829,872 | <0,001 | Yes         |
| Row 74 vs. Row 39 | 70,380 | 8829,619 | <0,001 | Yes         |
| Row 74 vs. Row 31 | 68,480 | 8828,820 | <0,001 | Yes         |
| Row 74 vs. Row 45 | 68,180 | 8828,693 | <0,001 | Yes         |
| Row 74 vs. Row 21 | 67,180 | 8828,273 | <0,001 | Yes         |
| Row 74 vs. Row 15 | 61,980 | 8826,084 | <0,001 | Yes         |
| Row 74 vs. Row 11 | 61,180 | 8825,748 | <0,001 | Yes         |
| Row 74 vs. Row 64 | 60,780 | 8825,579 | <0,001 | Yes         |
| Row 74 vs. Row 10 | 59,610 | 8825,087 | <0,001 | Yes         |
| Row 74 vs. Row 49 | 59,610 | 8825,087 | <0,001 | Yes         |
| Row 74 vs. Row 2  | 59,610 | 8825,087 | <0,001 | Yes         |
| Row 74 vs. Row 12 | 58,730 | 8824,716 | <0,001 | Yes         |
| Row 74 vs. Row 8  | 57,030 | 8824,001 | <0,001 | Yes         |
| Row 74 vs. Row 19 | 56,780 | 8823,896 | <0,001 | Yes         |
| Row 74 vs. Row 62 | 55,980 | 8823,559 | <0,001 | Yes         |
| Row 74 vs. Row 9  | 55,760 | 8823,467 | <0,001 | Yes         |
| Row 74 vs. Row 66 | 55,760 | 8823,467 | <0,001 | Yes         |
| Row 74 vs. Row 23 | 53,980 | 8822,717 | <0,001 | Yes         |
| Row 74 vs. Row 3  | 53,580 | 8822,549 | <0,001 | Yes         |
| Row 74 vs. Row 71 | 53,580 | 8822,549 | <0,001 | Yes         |
| Row 74 vs. Row 50 | 52,780 | 8822,212 | <0,001 | Yes         |
| Row 74 vs. Row 67 | 52,080 | 8821,918 | <0,001 | Yes         |
| Row 74 vs. Row 16 | 52,030 | 8821,897 | <0,001 | Yes         |
| Row 74 vs. Row 24 | 52,030 | 8821,897 | <0,001 | Yes         |
| Row 74 vs. Row 46 | 51,180 | 8821,539 | <0,001 | Yes         |
| Row 74 vs. Row 55 | 50,380 | 8821,202 | <0,001 | Yes         |
| Row 74 vs. Row 36 | 50,380 | 8821,202 | <0,001 | Yes         |
| Row 74 vs. Row 72 | 50,380 | 8821,202 | <0,001 | Yes         |
| Row 74 vs. Row 80 | 50,380 | 8821,202 | <0,001 | Yes         |
| Row 74 vs. Row 79 | 50,180 | 8821,118 | <0,001 | Yes         |
| Row 74 vs. Row 88 | 48,730 | 8820,508 | <0,001 | Yes         |
| Row 74 vs. Row 18 | 48,070 | 8820,230 | <0,001 | Yes         |
| Row 74 vs. Row 43 | 47,030 | 8819,793 | <0,001 | Yes         |
| Row 74 vs. Row 75 | 45,380 | 8819,098 | <0,001 | Yes         |
| Row 74 vs. Row 35 | 44,780 | 8818,846 | <0,001 | Yes         |
| Row 74 vs. Row 1  | 44,230 | 8818,614 | <0,001 | Yes         |
| Row 74 vs. Row 84 | 43,680 | 8818,383 | <0,001 | Yes         |
| Row 74 vs. Row 4  | 42,030 | 8817,688 | <0,001 | Yes         |
| Row 74 vs. Row 20 | 40,380 | 8816,994 | <0,001 | Yes         |
| Row 74 vs. Row 76 | 38,730 | 8816,299 | <0,001 | Yes         |
| Row 74 vs. Row 7  | 38,580 | 8816,236 | <0,001 | Yes         |
| Row 74 vs. Row 83 | 37,280 | 8815,689 | <0,001 | Yes         |
| Row 74 vs. Row 28 | 37,030 | 8815,584 | <0,001 | Yes         |
| Row 74 vs. Row 27 | 35,880 | 8815,100 | <0,001 | Yes         |
| Row 74 vs. Row 68 | 35,380 | 8814,890 | <0,001 | Yes         |
| Row 74 vs. Row 32 | 34,880 | 8814,679 | <0,001 | Yes         |
| Row 74 vs. Row 26 | 34,610 | 8814,566 | <0,001 | Yes         |
| Row 74 vs. Row 59 | 33,730 | 8814,195 | <0,001 | Yes         |
| Row 74 vs. Row 51 | 33,730 | 8814,195 | <0,001 | Yes         |
| Row 74 vs. Row 54 | 32,180 | 8813,543 | <0,001 | Yes         |
| Row 74 vs. Row 47 | 32,030 | 8813,480 | <0,001 | Yes         |
| Row 74 vs. Row 57 | 28,840 | 8812,137 | <0,001 | Yes         |
| Row 74 vs. Row 56 | 27,450 | 8811,552 | <0,001 | Yes         |
| Row 74 vs. Row 42 | 27,080 | 8811,397 | <0,001 | Yes         |
| Row 74 vs. Row 63 | 23,730 | 88 9,987 | <0,001 | Yes         |
| Row 74 vs. Row 41 | 13,460 | 88 5,665 | 0,117  | Do Not Test |
| Row 74 vs. Row 40 | 9,610  | 88 4,044 | 0,940  | Do Not Test |
| Row 74 vs. Row 65 | 3,840  | 88 1,616 | 1,000  | Do Not Test |
| Row 74 vs. Row 17 | 3,840  | 88 1,616 | 1,000  | Do Not Test |

|                   |        |          |        |     |
|-------------------|--------|----------|--------|-----|
| Row 17 vs. Row 22 | 86,240 | 8836,294 | <0,001 | Yes |
| Row 17 vs. Row 14 | 83,040 | 8834,947 | <0,001 | Yes |
| Row 17 vs. Row 30 | 82,240 | 8834,611 | <0,001 | Yes |
| Row 17 vs. Row 53 | 80,040 | 8833,685 | <0,001 | Yes |
| Row 17 vs. Row 78 | 79,640 | 8833,516 | <0,001 | Yes |
| Row 17 vs. Row 87 | 79,540 | 8833,474 | <0,001 | Yes |
| Row 17 vs. Row 13 | 79,440 | 8833,432 | <0,001 | Yes |
| Row 17 vs. Row 37 | 79,040 | 8833,264 | <0,001 | Yes |
| Row 17 vs. Row 5  | 78,640 | 8833,096 | <0,001 | Yes |
| Row 17 vs. Row 60 | 76,240 | 8832,085 | <0,001 | Yes |
| Row 17 vs. Row 38 | 75,540 | 8831,791 | <0,001 | Yes |
| Row 17 vs. Row 29 | 75,440 | 8831,749 | <0,001 | Yes |
| Row 17 vs. Row 85 | 75,240 | 8831,665 | <0,001 | Yes |
| Row 17 vs. Row 6  | 74,740 | 8831,454 | <0,001 | Yes |
| Row 17 vs. Row 52 | 72,240 | 8830,402 | <0,001 | Yes |
| Row 17 vs. Row 69 | 72,140 | 8830,360 | <0,001 | Yes |
| Row 17 vs. Row 77 | 71,740 | 8830,192 | <0,001 | Yes |
| Row 17 vs. Row 61 | 71,240 | 8829,981 | <0,001 | Yes |
| Row 17 vs. Row 70 | 71,140 | 8829,939 | <0,001 | Yes |
| Row 17 vs. Row 86 | 70,040 | 8829,476 | <0,001 | Yes |
| Row 17 vs. Row 44 | 68,040 | 8828,635 | <0,001 | Yes |
| Row 17 vs. Row 58 | 67,140 | 8828,256 | <0,001 | Yes |
| Row 17 vs. Row 39 | 66,540 | 8828,003 | <0,001 | Yes |
| Row 17 vs. Row 31 | 64,640 | 8827,204 | <0,001 | Yes |
| Row 17 vs. Row 45 | 64,340 | 8827,077 | <0,001 | Yes |
| Row 17 vs. Row 21 | 63,340 | 8826,657 | <0,001 | Yes |
| Row 17 vs. Row 15 | 58,140 | 8824,468 | <0,001 | Yes |
| Row 17 vs. Row 11 | 57,340 | 8824,131 | <0,001 | Yes |
| Row 17 vs. Row 64 | 56,940 | 8823,963 | <0,001 | Yes |
| Row 17 vs. Row 10 | 55,770 | 8823,471 | <0,001 | Yes |
| Row 17 vs. Row 49 | 55,770 | 8823,471 | <0,001 | Yes |
| Row 17 vs. Row 2  | 55,770 | 8823,471 | <0,001 | Yes |
| Row 17 vs. Row 12 | 54,890 | 8823,100 | <0,001 | Yes |
| Row 17 vs. Row 8  | 53,190 | 8822,385 | <0,001 | Yes |
| Row 17 vs. Row 19 | 52,940 | 8822,280 | <0,001 | Yes |
| Row 17 vs. Row 62 | 52,140 | 8821,943 | <0,001 | Yes |
| Row 17 vs. Row 9  | 51,920 | 8821,850 | <0,001 | Yes |
| Row 17 vs. Row 66 | 51,920 | 8821,850 | <0,001 | Yes |
| Row 17 vs. Row 23 | 50,140 | 8821,101 | <0,001 | Yes |
| Row 17 vs. Row 3  | 49,740 | 8820,933 | <0,001 | Yes |
| Row 17 vs. Row 71 | 49,740 | 8820,933 | <0,001 | Yes |
| Row 17 vs. Row 50 | 48,940 | 8820,596 | <0,001 | Yes |
| Row 17 vs. Row 67 | 48,240 | 8820,302 | <0,001 | Yes |
| Row 17 vs. Row 16 | 48,190 | 8820,281 | <0,001 | Yes |
| Row 17 vs. Row 24 | 48,190 | 8820,281 | <0,001 | Yes |
| Row 17 vs. Row 46 | 47,340 | 8819,923 | <0,001 | Yes |
| Row 17 vs. Row 55 | 46,540 | 8819,586 | <0,001 | Yes |
| Row 17 vs. Row 36 | 46,540 | 8819,586 | <0,001 | Yes |
| Row 17 vs. Row 72 | 46,540 | 8819,586 | <0,001 | Yes |
| Row 17 vs. Row 80 | 46,540 | 8819,586 | <0,001 | Yes |
| Row 17 vs. Row 79 | 46,340 | 8819,502 | <0,001 | Yes |
| Row 17 vs. Row 88 | 44,890 | 8818,892 | <0,001 | Yes |
| Row 17 vs. Row 18 | 44,230 | 8818,614 | <0,001 | Yes |
| Row 17 vs. Row 43 | 43,190 | 8818,176 | <0,001 | Yes |
| Row 17 vs. Row 75 | 41,540 | 8817,482 | <0,001 | Yes |
| Row 17 vs. Row 35 | 40,940 | 8817,230 | <0,001 | Yes |
| Row 17 vs. Row 1  | 40,390 | 8816,998 | <0,001 | Yes |
| Row 17 vs. Row 84 | 39,840 | 8816,767 | <0,001 | Yes |
| Row 17 vs. Row 4  | 38,190 | 8816,072 | <0,001 | Yes |
| Row 17 vs. Row 20 | 36,540 | 8815,378 | <0,001 | Yes |
| Row 17 vs. Row 76 | 34,890 | 8814,683 | <0,001 | Yes |
| Row 17 vs. Row 7  | 34,740 | 8814,620 | <0,001 | Yes |
| Row 17 vs. Row 83 | 33,440 | 8814,073 | <0,001 | Yes |
| Row 17 vs. Row 28 | 33,190 | 8813,968 | <0,001 | Yes |
| Row 17 vs. Row 27 | 32,040 | 8813,484 | <0,001 | Yes |
| Row 17 vs. Row 68 | 31,540 | 8813,274 | <0,001 | Yes |

|                   |        |          |        |             |
|-------------------|--------|----------|--------|-------------|
| Row 17 vs. Row 32 | 31,040 | 8813,063 | <0,001 | Yes         |
| Row 17 vs. Row 26 | 30,770 | 8812,950 | <0,001 | Yes         |
| Row 17 vs. Row 59 | 29,890 | 8812,579 | <0,001 | Yes         |
| Row 17 vs. Row 51 | 29,890 | 8812,579 | <0,001 | Yes         |
| Row 17 vs. Row 54 | 28,340 | 8811,927 | <0,001 | Yes         |
| Row 17 vs. Row 47 | 28,190 | 8811,864 | <0,001 | Yes         |
| Row 17 vs. Row 57 | 25,000 | 8810,521 | <0,001 | Yes         |
| Row 17 vs. Row 56 | 23,610 | 88 9,936 | <0,001 | Yes         |
| Row 17 vs. Row 42 | 23,240 | 88 9,781 | <0,001 | Yes         |
| Row 17 vs. Row 63 | 19,890 | 88 8,371 | <0,001 | Yes         |
| Row 17 vs. Row 41 | 9,620  | 88 4,049 | 0,939  | Do Not Test |
| Row 17 vs. Row 40 | 5,770  | 88 2,428 | 1,000  | Do Not Test |
| Row 17 vs. Row 65 | 0,000  | 88 0,000 | 1,000  | Do Not Test |
| Row 65 vs. Row 22 | 86,240 | 8836,294 | <0,001 | Yes         |
| Row 65 vs. Row 14 | 83,040 | 8834,947 | <0,001 | Yes         |
| Row 65 vs. Row 30 | 82,240 | 8834,611 | <0,001 | Yes         |
| Row 65 vs. Row 53 | 80,040 | 8833,685 | <0,001 | Yes         |
| Row 65 vs. Row 78 | 79,640 | 8833,516 | <0,001 | Yes         |
| Row 65 vs. Row 87 | 79,540 | 8833,474 | <0,001 | Yes         |
| Row 65 vs. Row 13 | 79,440 | 8833,432 | <0,001 | Yes         |
| Row 65 vs. Row 37 | 79,040 | 8833,264 | <0,001 | Yes         |
| Row 65 vs. Row 5  | 78,640 | 8833,096 | <0,001 | Yes         |
| Row 65 vs. Row 60 | 76,240 | 8832,085 | <0,001 | Yes         |
| Row 65 vs. Row 38 | 75,540 | 8831,791 | <0,001 | Yes         |
| Row 65 vs. Row 29 | 75,440 | 8831,749 | <0,001 | Yes         |
| Row 65 vs. Row 85 | 75,240 | 8831,665 | <0,001 | Yes         |
| Row 65 vs. Row 6  | 74,740 | 8831,454 | <0,001 | Yes         |
| Row 65 vs. Row 52 | 72,240 | 8830,402 | <0,001 | Yes         |
| Row 65 vs. Row 69 | 72,140 | 8830,360 | <0,001 | Yes         |
| Row 65 vs. Row 77 | 71,740 | 8830,192 | <0,001 | Yes         |
| Row 65 vs. Row 61 | 71,240 | 8829,981 | <0,001 | Yes         |
| Row 65 vs. Row 70 | 71,140 | 8829,939 | <0,001 | Yes         |
| Row 65 vs. Row 86 | 70,040 | 8829,476 | <0,001 | Yes         |
| Row 65 vs. Row 44 | 68,040 | 8828,635 | <0,001 | Yes         |
| Row 65 vs. Row 58 | 67,140 | 8828,256 | <0,001 | Yes         |
| Row 65 vs. Row 39 | 66,540 | 8828,003 | <0,001 | Yes         |
| Row 65 vs. Row 31 | 64,640 | 8827,204 | <0,001 | Yes         |
| Row 65 vs. Row 45 | 64,340 | 8827,077 | <0,001 | Yes         |
| Row 65 vs. Row 21 | 63,340 | 8826,657 | <0,001 | Yes         |
| Row 65 vs. Row 15 | 58,140 | 8824,468 | <0,001 | Yes         |
| Row 65 vs. Row 11 | 57,340 | 8824,131 | <0,001 | Yes         |
| Row 65 vs. Row 64 | 56,940 | 8823,963 | <0,001 | Yes         |
| Row 65 vs. Row 10 | 55,770 | 8823,471 | <0,001 | Yes         |
| Row 65 vs. Row 49 | 55,770 | 8823,471 | <0,001 | Yes         |
| Row 65 vs. Row 2  | 55,770 | 8823,471 | <0,001 | Yes         |
| Row 65 vs. Row 12 | 54,890 | 8823,100 | <0,001 | Yes         |
| Row 65 vs. Row 8  | 53,190 | 8822,385 | <0,001 | Yes         |
| Row 65 vs. Row 19 | 52,940 | 8822,280 | <0,001 | Yes         |
| Row 65 vs. Row 62 | 52,140 | 8821,943 | <0,001 | Yes         |
| Row 65 vs. Row 9  | 51,920 | 8821,850 | <0,001 | Yes         |
| Row 65 vs. Row 66 | 51,920 | 8821,850 | <0,001 | Yes         |
| Row 65 vs. Row 23 | 50,140 | 8821,101 | <0,001 | Yes         |
| Row 65 vs. Row 3  | 49,740 | 8820,933 | <0,001 | Yes         |
| Row 65 vs. Row 71 | 49,740 | 8820,933 | <0,001 | Yes         |
| Row 65 vs. Row 50 | 48,940 | 8820,596 | <0,001 | Yes         |
| Row 65 vs. Row 67 | 48,240 | 8820,302 | <0,001 | Yes         |
| Row 65 vs. Row 16 | 48,190 | 8820,281 | <0,001 | Yes         |
| Row 65 vs. Row 24 | 48,190 | 8820,281 | <0,001 | Yes         |
| Row 65 vs. Row 46 | 47,340 | 8819,923 | <0,001 | Yes         |
| Row 65 vs. Row 55 | 46,540 | 8819,586 | <0,001 | Yes         |
| Row 65 vs. Row 36 | 46,540 | 8819,586 | <0,001 | Yes         |
| Row 65 vs. Row 72 | 46,540 | 8819,586 | <0,001 | Yes         |
| Row 65 vs. Row 80 | 46,540 | 8819,586 | <0,001 | Yes         |
| Row 65 vs. Row 79 | 46,340 | 8819,502 | <0,001 | Yes         |
| Row 65 vs. Row 88 | 44,890 | 8818,892 | <0,001 | Yes         |
| Row 65 vs. Row 18 | 44,230 | 8818,614 | <0,001 | Yes         |

|                   |        |          |        |             |
|-------------------|--------|----------|--------|-------------|
| Row 65 vs. Row 43 | 43,190 | 8818,176 | <0,001 | Yes         |
| Row 65 vs. Row 75 | 41,540 | 8817,482 | <0,001 | Yes         |
| Row 65 vs. Row 35 | 40,940 | 8817,230 | <0,001 | Yes         |
| Row 65 vs. Row 1  | 40,390 | 8816,998 | <0,001 | Yes         |
| Row 65 vs. Row 84 | 39,840 | 8816,767 | <0,001 | Yes         |
| Row 65 vs. Row 4  | 38,190 | 8816,072 | <0,001 | Yes         |
| Row 65 vs. Row 20 | 36,540 | 8815,378 | <0,001 | Yes         |
| Row 65 vs. Row 76 | 34,890 | 8814,683 | <0,001 | Yes         |
| Row 65 vs. Row 7  | 34,740 | 8814,620 | <0,001 | Yes         |
| Row 65 vs. Row 83 | 33,440 | 8814,073 | <0,001 | Yes         |
| Row 65 vs. Row 28 | 33,190 | 8813,968 | <0,001 | Yes         |
| Row 65 vs. Row 27 | 32,040 | 8813,484 | <0,001 | Yes         |
| Row 65 vs. Row 68 | 31,540 | 8813,274 | <0,001 | Yes         |
| Row 65 vs. Row 32 | 31,040 | 8813,063 | <0,001 | Yes         |
| Row 65 vs. Row 26 | 30,770 | 8812,950 | <0,001 | Yes         |
| Row 65 vs. Row 59 | 29,890 | 8812,579 | <0,001 | Yes         |
| Row 65 vs. Row 51 | 29,890 | 8812,579 | <0,001 | Yes         |
| Row 65 vs. Row 54 | 28,340 | 8811,927 | <0,001 | Yes         |
| Row 65 vs. Row 47 | 28,190 | 8811,864 | <0,001 | Yes         |
| Row 65 vs. Row 57 | 25,000 | 8810,521 | <0,001 | Yes         |
| Row 65 vs. Row 56 | 23,610 | 88 9,936 | <0,001 | Yes         |
| Row 65 vs. Row 42 | 23,240 | 88 9,781 | <0,001 | Yes         |
| Row 65 vs. Row 63 | 19,890 | 88 8,371 | <0,001 | Yes         |
| Row 65 vs. Row 41 | 9,620  | 88 4,049 | 0,939  | Do Not Test |
| Row 65 vs. Row 40 | 5,770  | 88 2,428 | 1,000  | Do Not Test |
| Row 40 vs. Row 22 | 80,470 | 8833,866 | <0,001 | Yes         |
| Row 40 vs. Row 14 | 77,270 | 8832,519 | <0,001 | Yes         |
| Row 40 vs. Row 30 | 76,470 | 8832,182 | <0,001 | Yes         |
| Row 40 vs. Row 53 | 74,270 | 8831,256 | <0,001 | Yes         |
| Row 40 vs. Row 78 | 73,870 | 8831,088 | <0,001 | Yes         |
| Row 40 vs. Row 87 | 73,770 | 8831,046 | <0,001 | Yes         |
| Row 40 vs. Row 13 | 73,670 | 8831,004 | <0,001 | Yes         |
| Row 40 vs. Row 37 | 73,270 | 8830,836 | <0,001 | Yes         |
| Row 40 vs. Row 5  | 72,870 | 8830,667 | <0,001 | Yes         |
| Row 40 vs. Row 60 | 70,470 | 8829,657 | <0,001 | Yes         |
| Row 40 vs. Row 38 | 69,770 | 8829,363 | <0,001 | Yes         |
| Row 40 vs. Row 29 | 69,670 | 8829,321 | <0,001 | Yes         |
| Row 40 vs. Row 85 | 69,470 | 8829,236 | <0,001 | Yes         |
| Row 40 vs. Row 6  | 68,970 | 8829,026 | <0,001 | Yes         |
| Row 40 vs. Row 52 | 66,470 | 8827,974 | <0,001 | Yes         |
| Row 40 vs. Row 69 | 66,370 | 8827,932 | <0,001 | Yes         |
| Row 40 vs. Row 77 | 65,970 | 8827,763 | <0,001 | Yes         |
| Row 40 vs. Row 61 | 65,470 | 8827,553 | <0,001 | Yes         |
| Row 40 vs. Row 70 | 65,370 | 8827,511 | <0,001 | Yes         |
| Row 40 vs. Row 86 | 64,270 | 8827,048 | <0,001 | Yes         |
| Row 40 vs. Row 44 | 62,270 | 8826,206 | <0,001 | Yes         |
| Row 40 vs. Row 58 | 61,370 | 8825,827 | <0,001 | Yes         |
| Row 40 vs. Row 39 | 60,770 | 8825,575 | <0,001 | Yes         |
| Row 40 vs. Row 31 | 58,870 | 8824,775 | <0,001 | Yes         |
| Row 40 vs. Row 45 | 58,570 | 8824,649 | <0,001 | Yes         |
| Row 40 vs. Row 21 | 57,570 | 8824,228 | <0,001 | Yes         |
| Row 40 vs. Row 15 | 52,370 | 8822,040 | <0,001 | Yes         |
| Row 40 vs. Row 11 | 51,570 | 8821,703 | <0,001 | Yes         |
| Row 40 vs. Row 64 | 51,170 | 8821,535 | <0,001 | Yes         |
| Row 40 vs. Row 10 | 50,000 | 8821,042 | <0,001 | Yes         |
| Row 40 vs. Row 49 | 50,000 | 8821,042 | <0,001 | Yes         |
| Row 40 vs. Row 2  | 50,000 | 8821,042 | <0,001 | Yes         |
| Row 40 vs. Row 12 | 49,120 | 8820,672 | <0,001 | Yes         |
| Row 40 vs. Row 8  | 47,420 | 8819,957 | <0,001 | Yes         |
| Row 40 vs. Row 19 | 47,170 | 8819,851 | <0,001 | Yes         |
| Row 40 vs. Row 62 | 46,370 | 8819,515 | <0,001 | Yes         |
| Row 40 vs. Row 9  | 46,150 | 8819,422 | <0,001 | Yes         |
| Row 40 vs. Row 66 | 46,150 | 8819,422 | <0,001 | Yes         |
| Row 40 vs. Row 23 | 44,370 | 8818,673 | <0,001 | Yes         |
| Row 40 vs. Row 3  | 43,970 | 8818,505 | <0,001 | Yes         |
| Row 40 vs. Row 71 | 43,970 | 8818,505 | <0,001 | Yes         |

|                   |        |          |        |             |
|-------------------|--------|----------|--------|-------------|
| Row 40 vs. Row 50 | 43,170 | 8818,168 | <0,001 | Yes         |
| Row 40 vs. Row 67 | 42,470 | 8817,873 | <0,001 | Yes         |
| Row 40 vs. Row 16 | 42,420 | 8817,852 | <0,001 | Yes         |
| Row 40 vs. Row 24 | 42,420 | 8817,852 | <0,001 | Yes         |
| Row 40 vs. Row 46 | 41,570 | 8817,495 | <0,001 | Yes         |
| Row 40 vs. Row 55 | 40,770 | 8817,158 | <0,001 | Yes         |
| Row 40 vs. Row 36 | 40,770 | 8817,158 | <0,001 | Yes         |
| Row 40 vs. Row 72 | 40,770 | 8817,158 | <0,001 | Yes         |
| Row 40 vs. Row 80 | 40,770 | 8817,158 | <0,001 | Yes         |
| Row 40 vs. Row 79 | 40,570 | 8817,074 | <0,001 | Yes         |
| Row 40 vs. Row 88 | 39,120 | 8816,464 | <0,001 | Yes         |
| Row 40 vs. Row 18 | 38,460 | 8816,186 | <0,001 | Yes         |
| Row 40 vs. Row 43 | 37,420 | 8815,748 | <0,001 | Yes         |
| Row 40 vs. Row 75 | 35,770 | 8815,054 | <0,001 | Yes         |
| Row 40 vs. Row 35 | 35,170 | 8814,801 | <0,001 | Yes         |
| Row 40 vs. Row 1  | 34,620 | 8814,570 | <0,001 | Yes         |
| Row 40 vs. Row 84 | 34,070 | 8814,338 | <0,001 | Yes         |
| Row 40 vs. Row 4  | 32,420 | 8813,644 | <0,001 | Yes         |
| Row 40 vs. Row 20 | 30,770 | 8812,950 | <0,001 | Yes         |
| Row 40 vs. Row 76 | 29,120 | 8812,255 | <0,001 | Yes         |
| Row 40 vs. Row 7  | 28,970 | 8812,192 | <0,001 | Yes         |
| Row 40 vs. Row 83 | 27,670 | 8811,645 | <0,001 | Yes         |
| Row 40 vs. Row 28 | 27,420 | 8811,540 | <0,001 | Yes         |
| Row 40 vs. Row 27 | 26,270 | 8811,056 | <0,001 | Yes         |
| Row 40 vs. Row 68 | 25,770 | 8810,845 | <0,001 | Yes         |
| Row 40 vs. Row 32 | 25,270 | 8810,635 | <0,001 | Yes         |
| Row 40 vs. Row 26 | 25,000 | 8810,521 | <0,001 | Yes         |
| Row 40 vs. Row 59 | 24,120 | 8810,151 | <0,001 | Yes         |
| Row 40 vs. Row 51 | 24,120 | 8810,151 | <0,001 | Yes         |
| Row 40 vs. Row 54 | 22,570 | 88 9,499 | <0,001 | Yes         |
| Row 40 vs. Row 47 | 22,420 | 88 9,435 | <0,001 | Yes         |
| Row 40 vs. Row 57 | 19,230 | 88 8,093 | <0,001 | Yes         |
| Row 40 vs. Row 56 | 17,840 | 88 7,508 | <0,001 | Yes         |
| Row 40 vs. Row 42 | 17,470 | 88 7,352 | <0,001 | Yes         |
| Row 40 vs. Row 63 | 14,120 | 88 5,942 | 0,059  | No          |
| Row 40 vs. Row 41 | 3,850  | 88 1,620 | 1,000  | Do Not Test |
| Row 41 vs. Row 22 | 76,620 | 8832,245 | <0,001 | Yes         |
| Row 41 vs. Row 14 | 73,420 | 8830,899 | <0,001 | Yes         |
| Row 41 vs. Row 30 | 72,620 | 8830,562 | <0,001 | Yes         |
| Row 41 vs. Row 53 | 70,420 | 8829,636 | <0,001 | Yes         |
| Row 41 vs. Row 78 | 70,020 | 8829,468 | <0,001 | Yes         |
| Row 41 vs. Row 87 | 69,920 | 8829,426 | <0,001 | Yes         |
| Row 41 vs. Row 13 | 69,820 | 8829,384 | <0,001 | Yes         |
| Row 41 vs. Row 37 | 69,420 | 8829,215 | <0,001 | Yes         |
| Row 41 vs. Row 5  | 69,020 | 8829,047 | <0,001 | Yes         |
| Row 41 vs. Row 60 | 66,620 | 8828,037 | <0,001 | Yes         |
| Row 41 vs. Row 38 | 65,920 | 8827,742 | <0,001 | Yes         |
| Row 41 vs. Row 29 | 65,820 | 8827,700 | <0,001 | Yes         |
| Row 41 vs. Row 85 | 65,620 | 8827,616 | <0,001 | Yes         |
| Row 41 vs. Row 6  | 65,120 | 8827,406 | <0,001 | Yes         |
| Row 41 vs. Row 52 | 62,620 | 8826,354 | <0,001 | Yes         |
| Row 41 vs. Row 69 | 62,520 | 8826,311 | <0,001 | Yes         |
| Row 41 vs. Row 77 | 62,120 | 8826,143 | <0,001 | Yes         |
| Row 41 vs. Row 61 | 61,620 | 8825,933 | <0,001 | Yes         |
| Row 41 vs. Row 70 | 61,520 | 8825,891 | <0,001 | Yes         |
| Row 41 vs. Row 86 | 60,420 | 8825,428 | <0,001 | Yes         |
| Row 41 vs. Row 44 | 58,420 | 8824,586 | <0,001 | Yes         |
| Row 41 vs. Row 58 | 57,520 | 8824,207 | <0,001 | Yes         |
| Row 41 vs. Row 39 | 56,920 | 8823,955 | <0,001 | Yes         |
| Row 41 vs. Row 31 | 55,020 | 8823,155 | <0,001 | Yes         |
| Row 41 vs. Row 45 | 54,720 | 8823,029 | <0,001 | Yes         |
| Row 41 vs. Row 21 | 53,720 | 8822,608 | <0,001 | Yes         |
| Row 41 vs. Row 15 | 48,520 | 8820,420 | <0,001 | Yes         |
| Row 41 vs. Row 11 | 47,720 | 8820,083 | <0,001 | Yes         |
| Row 41 vs. Row 64 | 47,320 | 8819,915 | <0,001 | Yes         |
| Row 41 vs. Row 10 | 46,150 | 8819,422 | <0,001 | Yes         |



|                   |           |             |             |             |
|-------------------|-----------|-------------|-------------|-------------|
| Row 41 vs. Row 49 | 46,150    | 8819,422    | <0,001      | Yes         |
| Row 41 vs. Row 2  | 46,150    | 8819,422    | <0,001      | Yes         |
| Row 41 vs. Row 12 | 45,270    | 8819,052    | <0,001      | Yes         |
| Row 41 vs. Row 8  | 43,570    | 8818,336    | <0,001      | Yes         |
| Row 41 vs. Row 19 | 43,320    | 8818,231    | <0,001      | Yes         |
| Row 41 vs. Row 62 | 42,520    | 8817,894    | <0,001      | Yes         |
| Row 41 vs. Row 9  | 42,300    | 8817,802    | <0,001      | Yes         |
| Row 41 vs. Row 66 | 42,300    | 8817,802    | <0,001      | Yes         |
| Row 41 vs. Row 23 | 40,520    | 8817,053    | <0,001      | Yes         |
| Row 41 vs. Row 3  | 40,120    | 8816,884    | <0,001      | Yes         |
| Row 41 vs. Row 71 | 40,120    | 8816,884    | <0,001      | Yes         |
| Row 41 vs. Row 50 | 39,320    | 8816,548    | <0,001      | Yes         |
| Row 41 vs. Row 67 | 38,620    | 8816,253    | <0,001      | Yes         |
| Row 41 vs. Row 16 | 38,570    | 8816,232    | <0,001      | Yes         |
| Row 41 vs. Row 24 | 38,570    | 8816,232    | <0,001      | Yes         |
| Row 41 vs. Row 46 | 37,720    | 8815,874    | <0,001      | Yes         |
| Row 41 vs. Row 55 | 36,920    | 8815,538    | <0,001      | Yes         |
| Row 41 vs. Row 36 | 36,920    | 8815,538    | <0,001      | Yes         |
| Row 41 vs. Row 72 | 36,920    | 8815,538    | <0,001      | Yes         |
| Row 41 vs. Row 80 | 36,920    | 8815,538    | <0,001      | Yes         |
| Row 41 vs. Row 79 | 36,720    | 8815,454    | <0,001      | Yes         |
| Row 41 vs. Row 88 | 35,270    | 8814,843    | <0,001      | Yes         |
| Row 41 vs. Row 18 | 34,610    | 8814,566    | <0,001      | Yes         |
| Row 41 vs. Row 43 | 33,570    | 8814,128    | <0,001      | Yes         |
| Row 41 vs. Row 75 | 31,920    | 8813,433    | <0,001      | Yes         |
| Row 41 vs. Row 35 | 31,320    | 8813,181    | <0,001      | Yes         |
| Row 41 vs. Row 1  | 30,770    | 8812,950    | <0,001      | Yes         |
| Row 41 vs. Row 84 | 30,220    | 8812,718    | <0,001      | Yes         |
| Row 41 vs. Row 4  | 28,570    | 8812,024    | <0,001      | Yes         |
| Row 41 vs. Row 20 | 26,920    | 8811,329    | <0,001      | Yes         |
| Row 41 vs. Row 76 | 25,270    | 8810,635    | <0,001      | Yes         |
| Row 41 vs. Row 7  | 25,120    | 8810,572    | <0,001      | Yes         |
| Row 41 vs. Row 83 | 23,820    | 8810,025    | <0,001      | Yes         |
| Row 41 vs. Row 28 | 23,570    | 88 9,919    | <0,001      | Yes         |
| Row 41 vs. Row 27 | 22,420    | 88 9,435    | <0,001      | Yes         |
| Row 41 vs. Row 68 | 21,920    | 88 9,225    | <0,001      | Yes         |
| Row 41 vs. Row 32 | 21,420    | 88 9,015    | <0,001      | Yes         |
| Row 41 vs. Row 26 | 21,150    | 88 8,901    | <0,001      | Yes         |
| Row 41 vs. Row 59 | 20,270    | 88 8,531    | <0,001      | Yes         |
| Row 41 vs. Row 51 | 20,270    | 88 8,531    | <0,001      | Yes         |
| Row 41 vs. Row 54 | 18,720    | 88 7,878    | <0,001      | Yes         |
| Row 41 vs. Row 47 | 18,570    | 88 7,815    | <0,001      | Yes         |
| Row 41 vs. Row 57 | 15,380    | 88 6,473    | 0,013       | Yes         |
| Row 41 vs. Row 56 | 13,990    | 88 5,888    | 0,068       | No          |
| Row 41 vs. Row 42 | 13,620    | 88 5,732    | 0,100       | Do Not Test |
| Row 41 vs. Row 63 | 10,270 88 | 4,322 0,840 | Do Not Test |             |

**Table S4: Statistical tables for one way ANOVA using Sigma Plot 14.0. ANOVA table for data in figure 2.**

| Source of Variation | DF | SS        | MS       | F       | P      |
|---------------------|----|-----------|----------|---------|--------|
| Between Groups      | 7  | 16837,409 | 2405,344 | 439,032 | <0,001 |
| Residual            | 16 | 87,660    | 5,479    |         |        |
| Total               | 23 | 16925,069 |          |         |        |

The differences in the mean values among the treatment groups are greater than would be expected by chance; there is a statistically significant difference ( $P = <0,001$ ).

All Pairwise Multiple Comparison Procedures (Tukey Test):

Comparisons for factor:

| Comparison      | Diff of Means | p       | q      | P | P<0,050 |
|-----------------|---------------|---------|--------|---|---------|
| Row 4 vs. Row 6 | 63,100        | 846,693 | <0,001 |   | Yes     |
| Row 4 vs. Row 8 | 62,500        | 846,249 | <0,001 |   | Yes     |
| Row 4 vs. Row 3 | 55,960        | 841,409 | <0,001 |   | Yes     |
| Row 4 vs. Row 7 | 39,590        | 829,296 | <0,001 |   | Yes     |
| Row 4 vs. Row 5 | 6,250         | 8 4,625 | 0,071  |   | No      |

|                 |        |         |        |             |
|-----------------|--------|---------|--------|-------------|
| Row 4 vs. Row 2 | 6,250  | 8 4,625 | 0,071  | Do Not Test |
| Row 4 vs. Row 1 | 4,170  | 8 3,086 | 0,410  | Do Not Test |
| Row 1 vs. Row 6 | 58,930 | 843,607 | <0,001 | Yes         |
| Row 1 vs. Row 8 | 58,330 | 843,163 | <0,001 | Yes         |
| Row 1 vs. Row 3 | 51,790 | 838,324 | <0,001 | Yes         |
| Row 1 vs. Row 7 | 35,420 | 826,210 | <0,001 | Yes         |
| Row 1 vs. Row 5 | 2,080  | 8 1,539 | 0,950  | Do Not Test |
| Row 1 vs. Row 2 | 2,080  | 8 1,539 | 0,950  | Do Not Test |
| Row 2 vs. Row 6 | 56,850 | 842,068 | <0,001 | Yes         |
| Row 2 vs. Row 8 | 56,250 | 841,624 | <0,001 | Yes         |
| Row 2 vs. Row 3 | 49,710 | 836,784 | <0,001 | Yes         |
| Row 2 vs. Row 7 | 33,340 | 824,671 | <0,001 | Yes         |
| Row 2 vs. Row 5 | 0,000  | 8 0,000 | 1,000  | Do Not Test |
| Row 5 vs. Row 6 | 56,850 | 842,068 | <0,001 | Yes         |
| Row 5 vs. Row 8 | 56,250 | 841,624 | <0,001 | Yes         |
| Row 5 vs. Row 3 | 49,710 | 836,784 | <0,001 | Yes         |
| Row 5 vs. Row 7 | 33,340 | 824,671 | <0,001 | Yes         |
| Row 7 vs. Row 6 | 23,510 | 817,397 | <0,001 | Yes         |
| Row 7 vs. Row 8 | 22,910 | 816,953 | <0,001 | Yes         |
| Row 7 vs. Row 3 | 16,370 | 812,113 | <0,001 | Yes         |
| Row 3 vs. Row 6 | 7,140  | 8 5,283 | 0,030  | Yes         |
| Row 3 vs. Row 8 | 6,540  | 8 4,839 | 0,054  | No          |
| Row 8 vs. Row 6 | 0,600  | 8 0,444 | 1,000  | No          |

**Table S5: Statistical tables for one way ANOVA using Sigma Plot 14.0. ANOVA table for data in figure 3.**

| Source of Variation | DF | SS        | MS       | F       | P      |
|---------------------|----|-----------|----------|---------|--------|
| Between Groups      | 8  | 14544,360 | 1818,045 | 190,106 | <0,001 |
| Residual            | 18 | 172,140   | 9,563    |         |        |
| Total               | 26 | 14716,500 |          |         |        |

The differences in the mean values among the treatment groups are greater than would be expected by chance; there is a statistically significant difference ( $P = <0,001$ ).

All Pairwise Multiple Comparison Procedures (Tukey Test):

Comparisons for factor:

| Comparison      | Diff of Means | p       | q      | P | P<0,050 |
|-----------------|---------------|---------|--------|---|---------|
| Row 5 vs. Row 9 | 67,950        | 938,058 | <0,001 |   | Yes     |
| Row 5 vs. Row 2 | 67,950        | 938,058 | <0,001 |   | Yes     |
| Row 5 vs. Row 4 | 62,600        | 935,061 | <0,001 |   | Yes     |
| Row 5 vs. Row 7 | 58,350        | 932,681 | <0,001 |   | Yes     |
| Row 5 vs. Row 1 | 53,050        | 929,713 | <0,001 |   | Yes     |
| Row 5 vs. Row 3 | 32,350        | 918,119 | <0,001 |   | Yes     |
| Row 5 vs. Row 8 | 21,600        | 912,098 | <0,001 |   | Yes     |
| Row 5 vs. Row 6 | 21,500        | 912,042 | <0,001 |   | Yes     |
| Row 6 vs. Row 9 | 46,450        | 926,016 | <0,001 |   | Yes     |
| Row 6 vs. Row 2 | 46,450        | 926,016 | <0,001 |   | Yes     |
| Row 6 vs. Row 4 | 41,100        | 923,020 | <0,001 |   | Yes     |
| Row 6 vs. Row 7 | 36,850        | 920,639 | <0,001 |   | Yes     |
| Row 6 vs. Row 1 | 31,550        | 917,671 | <0,001 |   | Yes     |
| Row 6 vs. Row 3 | 10,850        | 9 6,077 | 0,010  |   | Yes     |
| Row 6 vs. Row 8 | 0,1000        | 90,0560 | 1,000  |   | No      |
| Row 8 vs. Row 9 | 46,350        | 925,960 | <0,001 |   | Yes     |
| Row 8 vs. Row 2 | 46,350        | 925,960 | <0,001 |   | Yes     |
| Row 8 vs. Row 4 | 41,000        | 922,964 | <0,001 |   | Yes     |
| Row 8 vs. Row 7 | 36,750        | 920,583 | <0,001 |   | Yes     |
| Row 8 vs. Row 1 | 31,450        | 917,615 | <0,001 |   | Yes     |
| Row 8 vs. Row 3 | 10,750        | 9 6,021 | 0,011  |   | Yes     |
| Row 3 vs. Row 9 | 35,600        | 919,939 | <0,001 |   | Yes     |
| Row 3 vs. Row 2 | 35,600        | 919,939 | <0,001 |   | Yes     |
| Row 3 vs. Row 4 | 30,250        | 916,943 | <0,001 |   | Yes     |
| Row 3 vs. Row 7 | 26,000        | 914,562 | <0,001 |   | Yes     |
| Row 3 vs. Row 1 | 20,700        | 911,594 | <0,001 |   | Yes     |
| Row 1 vs. Row 9 | 14,900        | 9 8,345 | <0,001 |   | Yes     |
| Row 1 vs. Row 2 | 14,900        | 9 8,345 | <0,001 |   | Yes     |

|                 |         |             |             |             |
|-----------------|---------|-------------|-------------|-------------|
| Row 1 vs. Row 4 | 9,550   | 9 5,349     | 0,029       | Yes         |
| Row 1 vs. Row 7 | 5,300   | 9 2,968     | 0,503       | No          |
| Row 7 vs. Row 9 | 9,600   | 9 5,377     | 0,028       | Yes         |
| Row 7 vs. Row 2 | 9,600   | 9 5,377     | 0,028       | Yes         |
| Row 7 vs. Row 4 | 4,250   | 9 2,380     | 0,749       | No          |
| Row 4 vs. Row 9 | 5,350   | 9 2,996     | 0,491       | No          |
| Row 4 vs. Row 2 | 5,350   | 9 2,996     | 0,491       | Do Not Test |
| Row 2 vs. Row 9 | 0,000 9 | 0,000 1,000 | Do Not Test |             |
